1 Utilisation of staphylococcal immune evasion protein Sbi as a novel  
2 vaccine adjuvant

3

4 Yang, Y. <sup>§1</sup>, Back, CR.<sup>§1</sup>, Gräwert, MA.<sup>2</sup>, Wahid, AA.<sup>1</sup>, Denton, H.<sup>3</sup>, Kildani, R.<sup>3</sup>, Paulin, J.<sup>3</sup>,  
5 Wörner, K.<sup>4</sup>, Kaiser, W.<sup>4</sup>, Svergun, DI.<sup>2</sup>, Sartbaeva, A.<sup>5</sup> Watts, AG.<sup>6</sup>, Marchbank, KJ.<sup>3\*</sup>, and  
6 van den Elsen, JMH<sup>1\*</sup>.

7

8 <sup>1</sup>Department of Biology and Biochemistry, University of Bath, Bath, UK

9 <sup>2</sup>European Molecular Biology Laboratory, Hamburg Unit

10 c/o Deutsches Elektronen-Synchrotron, Hamburg, Germany

11 <sup>3</sup>Institute of Cellular Medicine, Newcastle University, Newcastle-upon-Tyne, UK

12 <sup>4</sup>Dynamic Biosensors GmbH, Martinsried, Germany

13 <sup>5</sup>Department of Chemistry, University of Bath, Bath, UK

14 <sup>6</sup>Department of Pharmacy and Pharmacology, University of Bath, Bath, UK

15

16

17

18

19

20

21

22

23

24

25

26

27

28

29

30

31

32

33

34

35

36

37 <sup>§</sup>Contributed equally to this work

38

39 \*Co-Corresponding author addresses: Jean van den Elsen ([j.m.h.v.elsen@bath.ac.uk](mailto:j.m.h.v.elsen@bath.ac.uk)) and

40 Kevin James Marchbank ([Kevin.marchbank@ncl.ac.uk](mailto:Kevin.marchbank@ncl.ac.uk))

41

42 **Abstract**

43 Co-ligation of the B cell antigen receptor with complement receptor 2 on B-cells  
44 via a C3d-opsonised antigen complex significantly lowers the threshold required  
45 for B cell activation. Consequently, fusions of antigens with C3d polymers have  
46 shown great potential in vaccine design. However, these linear arrays of C3d  
47 multimers do not mimic the natural opsonisation of antigens with C3d. Here we  
48 investigate the potential of using the unique complement activating  
49 characteristics of Staphylococcal immune-evasion protein Sbi to develop a  
50 pro-vaccine approach that spontaneously coats antigens with C3 degradation  
51 products in a natural way. We show that Sbi rapidly triggers the alternative  
52 complement pathway through recruitment of complement regulators, forming a  
53 tripartite complex that acts as a competitive antagonist of factor H, resulting in  
54 enhanced complement consumption. These functional results are corroborated  
55 by the structure of this complement activating Sbi-III-IV:C3d:FHR-1 complex.  
56 Finally, we demonstrate that Sbi, fused with *Mycobacterium tuberculosis* antigen  
57 Ag85b, causes efficient opsonisation with C3 fragments, thereby enhancing the  
58 immune response significantly beyond that of Ag85b alone, providing proof of  
59 concept for our pro-vaccine approach.

## 60 **Introduction**

61 Opsonisation of an antigen with C3d(g), the final degradation product of  
62 complement component C3, results in the co-ligation of the B cell antigen  
63 receptor and complement receptor 2 (CR2) on B cells, thereby instigating a  
64 profound molecular adjuvant effect, i.e. this co-ligation of receptor complexes  
65 lowers the threshold of antigen required for B cell activation by up to 10,000 fold  
66 [1-3]. Furthermore, as CR2 is also expressed highly on follicular dendritic cells  
67 (FDCs) [4] the presence of C3d(g) on the antigen allows it to be trafficked onto  
68 and trapped at the surface of these cells [5]. This provides an essential depot of  
69 antigen to support the germinal center reaction and maintain the ongoing  
70 immune response including the generation of high affinity antibodies and  
71 memory B-cells [3, 4, 6]. B cells can also have an important role as antigen  
72 presenting cells (APCs) [7, 8] and have been shown to contribute to T-helper cell  
73 priming [9, 10] and therefore, antigen-C3d-CR2 interactions play a key role in  
74 humoral immunity [5]. Additionally, C3d activation of T helper cells has also  
75 been described in a CR2 independent manner [11], underlining the importance  
76 of C3d opsonisation in stimulation of the immune system to respond.

77 Not surprisingly, this functionality led to the idea that recombinant versions  
78 of C3d would make an ideal natural adjuvant and to the subsequent design of  
79 linear polymers of human C3d [12]. Indeed, these linear arrays of C3d multimers  
80 (3-mer to 20-mer) when fused directly to an antigen can act as potent activators  
81 of human B-cells. However, they do not mimic the natural opsonisation of

82 antigens by C3d at a molecular level and do not always enhance immune  
83 responses [13]. After activation of C3, C3b attaches directly to the antigen  
84 surface via the reactive thioester on the convex face of the protein's thioester  
85 domain (TED). In the presence of complement regulators (factor I (FI) and its  
86 co-factors, such as factor H (FH) and CR1) this is rapidly converted to iC3b and  
87 then to C3d, exposing the concave CR2 binding site of the TED fragment away  
88 from the antigen surface [14]. It is likely that multiple iC3b/C3d molecules attach  
89 to complex antigens/pathogen surfaces during the initial activation phases of  
90 complement, creating high-avidity binding site for complement fragment  
91 receptors.

92 In the last two decades, structural biology has helped to unveil many of the  
93 molecular aspects that are crucial for the activation and regulation of the  
94 complement system. Most notable are the crystal structures of the central  
95 complement component activation states, native C3 [15], activated C3b and  
96 inactive C3c [16]. The structure of C3b in complex with factors B and D [17]  
97 subsequently revealed a detailed view of the alternative pathway C3 convertase  
98 assembly and its activation, leading to the amplified cleavage of C3 molecules  
99 that result in opsonisation and clearance of microbial pathogens and host debris.  
100 The covalent attachment of C3b to surfaces does not discriminate between self  
101 or non-self surfaces and requires tight regulation to protect host surfaces.  
102 Structures of C3b in complex with FH domains 1-4 [18] and domains 19-20 [19,  
103 20] provided insights into protection of host cells [21] and demonstrated how



104 factor H-related proteins (FHRs) function as competitive antagonists of FH,  
105 modulating complement activation and providing improved discrimination of  
106 self and non-self surfaces [22]. The subsequent structure of the complex of C3b,  
107 FH<sub>1-4</sub> and regulator factor I [23] improved our understanding in the proteolytic  
108 cleavage of C3b to the late-stage opsonins iC3b or C3dg and provided the basis  
109 for the regulator-dependent differences in processing and immune recognition  
110 of opsonized material.

111 Here we investigate the potential to harness the unique  
112 complement-stimulatory characteristics of *Staphylococcus aureus*  
113 immunomodulator Sbi to develop ‘pro-vaccines’. Sbi components would trigger  
114 natural complement activation in the host and coat antigen surfaces with  
115 complement component C3 degradation products, thereby enhancing the degree  
116 of immunogenicity of target antigens. Research from our lab previously revealed  
117 that Sbi contains two domains (III and IV), which bind to the central complement  
118 component C3 and cause futile fluid phase consumption of this component [24].  
119 Therefore, these two domains of Sbi offer the potential to not only coat an  
120 antigen with the natural adjuvant C3d, but also to generate anaphylatoxins and  
121 the full range of C3 opsonins. Such an approach has the clear potential to activate  
122 many immune cells unlike recombinant C3d fragment-based adjuvants of the  
123 past, that, due to the restricted expression pattern of CR2, were largely focused  
124 to B cells. Furthermore, the direct activation of complement close to the target  
125 antigen (with the associated anaphylatoxin generation) may be critical for

126 generating appropriate inflammatory immune responses, both humoral and  
127 cellular; needed to immunise against complex pathogenic targets.

128 In this study we first investigate the molecular mode of action of Sbi-III-IV  
129 and evaluate the importance of the tripartite complex formation between Sbi,  
130 C3d and complement regulators factor H (FH) or factor H-related proteins (FHRs)  
131 for complement activation. Based on these findings, we then tested whether our  
132 pro-vaccine strategy would be successful by using *Mycobacterium tuberculosis*  
133 antigen 85b (Ag85b) as a model antigen in a fusion construct containing Sbi  
134 domains III and IV. We show that this Sbi-Ag85b conjugate is opsonized by C3  
135 degradation products in serum, and when administered to mice, leads to an  
136 enhanced immune response *in vivo*, but only in mice that possess C3 and  
137 complement receptor 1 and 2, demonstrating proof of concept for this adjuvant  
138 compound.

139 **Results:**

140

141 ***Sbi-III-IV triggers C3 consumption via activation of the alternative***  
142 ***complement pathway, forming a covalent adduct with C3b***

143 To investigate the molecular details of the C3 futile consumption caused by  
144 Sbi, a protein construct consisting of domains III and IV (Sbi-III-IV) was  
145 incubated with normal human serum (NHS) and analyzed using western blotting.  
146 As seen previously [24], we found that Sbi-III-IV-induced C3 consumption results  
147 in the deposition of metastable C3b molecules onto serum proteins, causing the  
148 formation of high molecular weight C3b covalent adduct species with serum  
149 proteins (Figure 1a). Immuno-blotting analyses using a polyclonal anti-Sbi  
150 antibody (Figure 1b) reveals that a small fraction of Sbi-III-IV molecule also  
151 forms a covalent adduct with a nascent C3b molecule that is subsequently  
152 converted into a smaller Sbi-iC3b adduct as a result of proteolytic processing by  
153 serum proteases. In addition, we show that Sbi-III-IV-induced C3 consumption  
154 coincides with the release of the C3a anaphylatoxin fragment (Figure 1c), and the  
155 proteolytic activation of factor B (FB) (Figure 1d), confirming the alternative  
156 complement pathway as the driving force behind this process. Pre-incubation of  
157 serum with Sbi-III-IV results in the loss of serum hemolytic ability caused by the  
158 futile consumption of fluid C3 (Figure 1e). Without pre-incubation, the Sbi-III-IV  
159 construct does not protect rabbit erythrocytes from lysis in NHS under AP  
160 conditions.

161 ***Sbi domain III residue K173 is essential for complement consumption***

162 In order to gain understanding of the individual roles of Sbi domains III and  
163 IV in AP activation, a systematic site-directed mutagenesis approach was used,  
164 mainly focusing on charged and polar amino acids (for details see  
165 Supplementary Table S1 and Figure S1). Functional screening of these mutants  
166 identified K173, located within Sbi domain III (Figure 1f), as an essential  
167 contributor to triggering C3 consumption. Sbi mutant K173A shows no  
168 complement activation after 30 minutes incubation with human serum,  
169 demonstrating a comparable complement activation defect to the previously  
170 identified C3d binding mutant R231A [24, 25] (Figure 1f and g), located in Sbi  
171 domain IV. Assessment of the C3d binding affinity, using *switchSENSE* (Table 1  
172 and Supplementary Figure S2A), shows that contrary to R231A the C3d binding  
173 capacity of K173A is unaffected, indicating it is essential for the role for domain  
174 III in the futile consumption of C3. Interestingly, our *switchSENSE* analyses of the  
175 C3d binding characteristics also shows a reduced hydrodynamic diameter for  
176 K173A compared to WT and the C3d impaired binding mutant R231A, indication  
177 that this mutation in domain III results in a more compact Sbi:C3d complex  
178 (Table 2 and Supplementary Figure S2B). A more detailed structural analysis of  
179 these conformational changes follows below.

180

181 ***Sbi-III-IV enhances binding of FH or FHRs to C3 breakdown products***

182 In a previous study, we reported that Sbi-III-IV binds C3 isoforms in

183 combination with the C-terminal part of FH (FH<sub>19-20</sub>), forming tripartite  
184 complexes [26]. Many FHRs share SCR modules with high FH<sub>19-20</sub> sequence  
185 identity [22] particularly FHR1 which has been demonstrated to have significant  
186 complement dysregulation potential [21]. Thus, we investigated the potential  
187 role for Sbi-III-IV in mediating the formation of tripartite complexes with C3  
188 fragments and FHR-1, FHR-2 or FHR-5.

189 On a C3b opsonised surface plasmon resonance (SPR) sensor chip, the  
190 presence of wild-type Sbi-III-IV clearly enhanced the binding of FH, FHR-1,  
191 FHR-2, FHR-5 as well as FH<sub>19-20</sub> (at fixed concentrations of 100, 12.5, 20, 25 and  
192 20nM, respectively) to the surface in a concentration dependent manner (Figure  
193 2a). However, in the case of the K173A mutant, tripartite complex formation  
194 with FH or FHR-1, 2, 5 or FH<sub>19-20</sub> is significantly impaired, showing decreased  
195 binding and more rapid dissociation compared to WT Sbi-III-IV (Figure 2b and  
196 2c). We also co-injected Sbi-III-IV with FH or FHR-1, flowing opsonized iC3b or  
197 amine-coupled C3d(g) across the surface. On these surfaces, the fold-changes in  
198 FH (or FHR-1) binding levels were also enhanced even at reduced Sbi-III-IV  
199 concentration (Supplementary Figures S3A-D).

200

### 201 ***Sbi-III-IV acts as a competitive antagonist of FH via the recruitment of FHRs***

202 Our SPR data, described above, show that Sbi-III-IV enables FH or FHR-1, 2  
203 and 5 binding to the C3 activation fragment C3b and late-stage proteolytic  
204 fragments iC3b and C3d(g). To further our understanding of the mechanism of

205 FH or FHR recruitment and the contribution of these tripartite complexes to AP  
206 complement activation, we used a rabbit erythrocyte haemolytic assay. In the  
207 presence of Sbi-III-IV and endogenous FH (and FHRs), in NHS, addition of  
208 recombinant FHR-1 or FHR-2 resulted in significantly enhanced C3 consumption  
209 (Figure 3a), as evidenced by the reduction in erythrocyte lysis in a concentration  
210 dependent manner. In the absence of Sbi-III-IV only baseline C3 consumption  
211 was observed. Although FHR-5 alone can reduce erythrocyte lysis in a  
212 concentration dependent manner, as described previously [27], in the presence  
213 of Sbi-III-IV C3 consumption by FHR-5 is clearly enhanced (Figure 3b). As  
214 predicted, the results in Figure 3c indicate that the observed reduction in  
215 erythrocyte lysis caused by C3 fluid phase consumption, in the case of FHR1 and  
216 likely the remaining FHRs, is mediated by the C-terminal SCR domains of the  
217 protein rather than the N-terminal domains.

218 Whilst our SPR and rabbit erythrocyte assay clearly indicate that *in vitro*  
219 Sbi-III-IV can recruit FHRs in tripartite complexes with C3b and thereby enhance  
220 fluid phase complement consumption, it has to be taken into account that the  
221 physiological molar concentrations of FHR-1, 2 and 5 are 13-164 fold less than  
222 that of FH [21, 28]. To further investigate the potential competitive binding  
223 between FH and the FHRs in Sbi-III-IV mediated tripartite complexes, we used an  
224 ELISA-based assay where we applied FH (25 nM) and Sbi-III-IV (1  $\mu$ M, in the  
225 presence of a concentration range of FHRs (9.3 – 150nM)) onto a C3b coated  
226 plate. Subsequently, we assessed the percentage of FH bound using monoclonal

227 antibody OX-24. Figure 3d shows that FHR-1 can compete with FH to bind C3b,  
228 decreasing the percentage of residual FH bound to C3b from ~70% at the lowest  
229 FHR-1 concentration to ~30% at the highest concentration. In the presence of  
230 Sbi-III-IV WT this effect is dramatically increased with only ~25% residual FH  
231 bound at the lowest FHR-1 concentration, reducing to ~0% at the highest FHR-1  
232 concentration (Figure 3e). These results clearly indicate that Sbi-III-IV can  
233 preferentially recruit FHR-1 to form a tripartite complex with C3b. Similarly,  
234 enhancement of recruitment was observed with FHR-5 and fragment FH<sub>19-20</sub> but  
235 only weakly with FHR-2. Although unable to activate complement, Sbi-III-IV  
236 mutant K173A is still able to compete for the binding of FHR-1 in the presence of  
237 FH, but its ability to enhance binding of FHR-2 and FHR-5 to C3b is clearly  
238 affected (Figure 3f).

239 To assess the potential AP de-regulatory roles of the Sbi-III-IV mediated  
240 tripartite complexes. We subjected them to a novel C3 convertase decay  
241 acceleration activity (DAA) assay and a fluid phase C3b co-factor activity (CFA)  
242 assay [29, 30]. We demonstrated that in absence of Sbi, FHR-1 failed to  
243 antagonise FH efficiently and show a difference in the level of C3 convertase  
244 formation (Figure 3g). Co-injection of FHR-1 and -5 shows reduced C3  
245 convertase formation, which is in accordance with the results from a previous  
246 study [31]. However, the presence of Sbi (2 $\mu$ M) potentiates the FH antagonising  
247 effect of FHR-1, and to a lesser extent that of FHR-5, at a physiologically relevant  
248 concentration ratio (FH 2000 nM: FHR-1 200 nM : FHR-5 20 nM), resulting in

249 increased C3 convertase formation on a C3b surface (Figure 3h). The baseline  
250 C3b breakdown rate was acquired in the presence of FH (0.160 $\mu$ M) and FI  
251 (0.017 $\mu$ M), and subsequent measurements were performed in the presence of  
252 FHR alone (0.32  $\mu$ M) and in combination with Sbi-III-IV (1  $\mu$ M). As shown in  
253 Figure 3i and Supplementary Figure S3F, the presence of FHR-1, 2 or 5 increases  
254 the C3b fluid phase half-life to different degrees, with FHR-5 showing the largest  
255 increase in half-life. Most interestingly, the C3b half-life could be further  
256 extended by the addition of Sbi-III-IV.

257

### 258 ***The Sbi-III-IV:C3d:FHR-1 tripartite complex forms a dimer in solution***

259 To investigate the structural characteristics of the Sbi-III-IV:C3d:FHR1  
260 tripartite complex, we used small angle X-ray scattering (SAXS). The scattering  
261 profile collected at an equimolar mixing ratio is shown in Figure 4 in log plot (a)  
262 as well as Kratky plot (b). The featureless descend in the log plot and the plateau  
263 in the latter is characteristic for scattering of particles that are, at least partially,  
264 disordered.

265 The SAXS data and the overall parameters obtained (Supplementary Table  
266 S2) suggest that the complex is largely dimeric but rather flexible in solution.  
267 Quantitative flexibility analysis was performed using the ensemble optimisation  
268 method EOM [32], which fits the experimental data using scattering computed  
269 from conformational ensembles. Models with randomized linkers were  
270 generated based on the known structures of FHR-1<sub>1-2</sub> (3zd2, [21]); FH<sub>18-20</sub> (3sw0,



271 [33]), containing the equivalent of FHR-1<sub>3</sub>; FH<sub>19-20</sub>:C3d complex (2xqw, [20]),  
272 corresponding with FHR-1<sub>4-5</sub>; and the Sbi-IV:C3d complex (2wy8, [34]). To  
273 account for the dimerisation, P2 symmetry was applied, using the FHR-1<sub>1-2</sub> dimer  
274 interface as seen in the crystal structure (3zd2). The distributions of the overall  
275 parameters in the selected structures compared with those of the original pool  
276 (Figure 4c) suggests that the complex is rather flexible with a slight preference  
277 for extended structures in solution. The subset of most typical models (and the  
278 volume percentage of their contribution) shown in Figure 4c indicate that in  
279 addition to the expected contact sites with C3d, Sbi-III domain appears to also  
280 interact with FHR-1, corroborating the functional results described above. Figure  
281 4d shows a schematic representation of the dimeric Sbi-III-IV:C3d:FHR-1  
282 complex observed in solution.

283

#### 284 ***K173A restricts the conformational freedom of Sbi domain III***

285 To examine the possible structural effects of the K173A substitution in Sbi  
286 domain III, SAXS data was collected on the Sbi-III-IV(K173A):C3d complex and  
287 compared to the wild-type Sbi-III-IV:C3d complex published previously [34]. The  
288 experimental scattering pattern collected at 240  $\mu\text{M}$  ( $\sim 12$  mg/ml) is presented  
289 in Figure 4e and the structural parameters derived from this data are given in  
290 Supplementary Table S2. The estimated molecular mass (MM) of the solute  
291 agrees within the errors with the values predicted for a 1:1 complex ( $\sim 15$  kDa +  
292 35 kDa). At lower concentration a decrease in the MM estimates is observed

293 which suggests that the complex slowly begins to dissociate. The previously  
294 described wild-type Sbi-III-IV:C3d data on the other hand, suggests that at higher  
295 concentrations, higher oligomeric species are present, thus, for the comparison  
296 here, data collected at 0.6 mg/ml is shown. The faster descend of the wild-type  
297 data, which translates to a larger Rg, suggests that rearrangements of the flexible  
298 N-terminus lead to a more elongated particle (Rg wild-type= 32.8 Å) as  
299 compared to K173A mutant (Rg K173A = 30.6 Å). This is in strong agreement  
300 with the *switchSENSE* analysis of the C3d binding characteristics, which show a  
301 reduced hydrodynamic diameter for K173A compared to WT (Table 2).

302 The *ab initio* low resolution models of the complex reconstructed from the  
303 highest concentration data using DAMMIF [35] showed a large cone shaped  
304 molecule with a volume of 124 nm<sup>3</sup> (Figure 4f). The resolution of the  
305 reconstruction is estimated to be 29 +/- 2 Å [36]. The large base of the cone can  
306 accommodate the crystal structure of Sbi-IV:C3d complex (2wy8) [34]. The extra  
307 space at the tip of the cone would be sufficient to harbor the 60 N-terminal  
308 residues comprising the Sbi-III domain. A more detailed modeling was  
309 conducted with the program Coral [37], utilizing the available high-resolution  
310 model of Sbi-IV:C3d and allowing for 60 additional beads to be added that mimic  
311 the missing Sbi-III domain. Twenty independent Coral runs were performed  
312 which all yielded models with a more or less structured N-terminal region,  
313 suggesting that Sbi-III-IV(K173A) in complex with C3d is conformationally  
314 restricted compared to wild-type Sbi-III-IV. This is further supported by the

315 narrow distributions obtained with EOM (Supplementary Figure S4B).  
316 Surprisingly, whilst repeating these analyses using a proposed alternative  
317 binding mode of the Sbi-IV:C3d complex (represented by 2wy7), where Sbi-IV is  
318 seen bound at the convex face of C3d, the  $\chi^2$  value is greatly improved  
319 (Supplementary Figure S4C). With this modeling approach a similar restricted  
320 conformation is observed for the N-terminus of Sbi-III-IV(K173A). Further  
321 studies are currently being conducted to further investigate the potential  
322 physiological relevance of this alternative Sbi-IV:C3d binding mode.

323

#### 324 ***A fusion construct of Sbi-III-IV with M. tuberculosis Ag85b activates the AP***

325 To test the potential of Sbi-III-IV to induce C3d opsonisation in a vaccine  
326 setting, a recombinant construct was designed whereby Sbi-III-IV is fused to  
327 *Mycobacterium* protein Ag85b (Figure 5a, and detailed in Supplementary Figure  
328 S5A). Based on the SAXS structure of the Sbi-III-IV:C3d:FHR-1 tripartite complex,  
329 revealing the importance of a flexible and extended conformation of Sbi domain  
330 III, we decided to attach Ag85b at the C-terminus of Sbi domain IV and included a  
331 long flexible linker between Sbi-IV and Ag85b to ensure accessibility and  
332 flexibility of the functional domains. Expressed and purified fusion protein was  
333 subsequently structurally and functionally characterized.

334 Circular dichroism analysis of the Sbi-III-IV-Ag85b fusion indicates that the  
335 protein construct is folded and that the secondary structural elements of both  
336 parent proteins have been preserved (Supplementary Figure S5B). SAXS data

337 obtained for the fusion protein demonstrate that both the Ag85b domain as well  
338 as Sbi-IV domain are accessible (Figure 5b and Supplementary Figure S5C).

339 Functional activity of the Sbi-III-IV-Ag85b fusion construct was assessed  
340 using an AP complement activity assays (WIESLAB, Euro Diagnostica), showing  
341 strong C3 depletion activity (Supplementary Figure S5D), whilst Ag85b on its  
342 own showed no complement activating properties. These results confirm that  
343 the complement activating properties of Sbi III-IV are not impaired as part of the  
344 fusion construct. The western blot analyses presented in Figure 5c and  
345 Supplementary Figure S5E confirm these results, showing both C3 activation and  
346 opsonisation by the Sbi-III-IV-Ag85b fusion construct when incubated with NHS.  
347 Interestingly, C3 activation and consumption occur more rapidly with the fusion  
348 construct when compared to Sbi-III-IV (Figure 1a and 1b) under the same  
349 conditions. Whilst Sbi-III-IV shows opsonisation with a single molecule of C3b  
350 (Figure 1b), the Sbi-III-IV-Ag85b fusion is opsonized by 2 molecules of C3b that  
351 over time degrade to iC3b and C3d (Figure 5c and Supplementary Figure S5E).  
352 Interestingly, opsonisation of Ag85b with C3 fragments also occurs when  
353 co-incubated with Sbi-III-IV in NHS.

354

### 355 ***Sbi-III-IV acts as an adjuvant in mice when immunized with Ag85b***

356 Based on the ability of Sbi-III-IV to activate complement (Figures 1b, 1c  
357 (human serum) and 6a (mouse serum)) and opsonise Ag85b with complement  
358 C3 break down fragments (Figure 5c), we expected that this new fusion protein  
359 when injected into mice would elicit a greater immune response to the

360 Sbi-III-IV-Ag85b fusion protein than Ag85b administered alone (in PBS). Indeed,  
361 wild-type C57bl/6 mice immunized I.P. (or I.V., data not shown) with  
362 Sbi-III-IV-Ag85b generated a greater than 4 fold increase in immune response  
363 initially and following the boost when compared to Ag85b alone (Figure 6b).  
364 Furthermore, when mice were immunized with a mixture of Sbi-III-IV and Ag85b  
365 (not fused together), this also resulted in a significantly improved immune  
366 response, corroborating the role of C3 fragment opsonisation of the antigen in  
367 this process (see Supplementary Figure S5E). Subsequent, studies using C3<sup>-/-</sup> and  
368 *Cr2*<sup>-/-</sup> mice clearly demonstrated that C3 and C3 breakdown fragment receptors  
369 (CR1 and CR2) were essential for this “adjuvant” function, respectively (Figure  
370 6c). Overall, these data clearly suggest that complement AP dysregulation  
371 function of the Sbi-III-IV domain can be harnessed to improve immune responses  
372 through the coating of antigens with C3 breakdown fragments.

373 **Discussion:**

374 Previous work from our group [24] revealed that *Staphylococcus aureus*  
375 immunomodulator Sbi binds complement component C3 within the thioester  
376 domain of C3 or the C3dg portion of the molecule and resulted in futile  
377 consumption of C3 via uncontrolled activation of the AP. In this study, we  
378 endeavored to both understand the mechanism of action of Sbi-III-IV and  
379 harness it; in order to develop pro-vaccines which would trigger natural  
380 complement activation and thereby coat antigen surfaces with complement  
381 component C3 degradation products, generate anaphylatoxins at the site of  
382 immunisation and strongly enhance the immunogenicity of antigens (Figure 7d).

383 The seminal studies by Pepys *et al* [38], using C3 activating/depleting agents  
384 including cobra venom factor and Zymosan, clearly demonstrated intact C3  
385 function was important for the T-dependent response [38]. A molecular  
386 mechanism explaining this effect was established by Fearon and colleagues [39]  
387 supported by studies in both C3 [40] and *Cr2* (complement receptor type I and II)  
388 knock-out mice [41]. Fearon *et al* exploited these findings and established that  
389 multiple copies of C3d, in a linear trimer, could enhance antigen-specific  
390 responses up to 10,000 fold [3]. However, the initial potential of trimeric C3d, as  
391 a highly potent molecular adjuvant, has not been realized and the reason(s) for  
392 this remain(s) unclear. One possible explanation is that the artificial linear  
393 trimer structure fails to represent naturally opsonised antigen, and consequently  
394 does not provide sufficient CR cross-linking or additional inflammatory signals

395 for the B cell (or APC) activation threshold to be reached. One possible approach  
396 to overcome this is attaching more C3d to test antigens, but that approach is also  
397 limited [42]. In the light of these and other findings [11, 13, 43], we considered  
398 that with understanding of the mode of action of Sbi-III-IV we might be able to  
399 develop a new complement activation based immune adjuvant.

400 The first clue to a mechanism for Sbi's ability to rapidly activate the AP came  
401 from monitoring Sbi-III-IV treated NHS in a time course using anti-C3 and  
402 anti-Sbi immuno-blotting. Here, we demonstrated that metastable C3b not only  
403 attaches covalently to serum proteins but also to Sbi-III-IV itself; as a  
404 transacylation target (Figure 1). This makes sense in the respect that Sbi's  
405 affinity to C3 obviously places it in close proximity to the site of complement  
406 turnover and we speculate that C3b deposited on Sbi-III-IV could help extend the  
407 fluid phase half-life of C3b, preventing FH and FI from binding and inactivating  
408 as normal, perhaps similar to covalent adducts of C3b with IgG [44, 45].

409 However, as we have shown previously, Sbi-III-IV also interacts with  
410 complement regulators FH and FHR-1, in addition to binding C3b and its  
411 degradation products, thereby forming tripartite complexes [26]. We next  
412 investigated whether Sbi-III-IV acts as a competitive antagonist of FH via the  
413 recruitment of FHR-1 and 5 into tripartite complexes and that FHR-1 can  
414 effectively displace FH from the tripartite complex. To this end, data from our  
415 systematic site-directed mutagenesis screen brought to light several Sbi mutants  
416 with complement activation defects (Figure 1, Supplementary Figure S1). For

417 instance, we demonstrated that an alanine substitution in Sbi domain III at  
418 position 173 resulted in a dramatic reduction in C3 consumption activity (Figure  
419 1g). Notably, although a similar effect was observed with a previously identified  
420 mutation in domain IV with impaired C3d binding (R231A), K173A showed only  
421 slightly impaired C3d binding capacity (Table 1) suggesting a different  
422 mechanism. We therefore postulated that the K173A mutant would be ideal to  
423 elucidate the structural and functional role of Sbi domain III in the activation of  
424 complement and found that K173 in Sbi domain III was crucial for the  
425 recruitment of FHR-5 and that the K173A mutation only slightly affects FHR-1  
426 binding (Figures 2 and 3). These findings implicate a direct role of Sbi domain III  
427 in the tripartite complex formation with these FHRs and that this likely occurs  
428 via interactions with the C-terminal SCR domains that share sequence identity  
429 with FH<sub>19-20</sub>. We confirm this by showing that increasing concentrations of  
430 recombinant FHR-1, FHR-2, FHR-5 and FH<sub>19-20</sub> in serum indeed potentiate  
431 Sbi-III-IV mediated C3 consumption, whilst the N-terminal SCRs (FHR-1<sub>1-2</sub>) fails  
432 to do this (Figure 3).

433 We also observed that Sbi greatly enhances the binding of FHRs to C3b,  
434 thereby antagonizing FH activity, as shown by the C3 convertase decay  
435 accelerating activity (DAA) assay (Figure 3 g and h). These results imply that the  
436 FHR-1 or FHR-5 containing tripartite complexes can protect the AP C3  
437 convertase, aiding the consumption of C3. These findings further enhance the  
438 notion that the FHR family has diversified AP de-regulatory functions, where



439 FHR-1 seems more efficient in counteracting the DAA of FH, whilst in contrast  
440 FHR-5 potently antagonizes the cofactor activity (CA) of FH. The observed  
441 Sbi-III-IV mediated shift in the complement regulatory balance towards C3  
442 activation could potentially be further enhanced by the formation of  
443 homo/heterodimeric forms of FHR-1 with itself and with other FHRs (FHR-2 and  
444 FHR-5) [12]. These data link to an ongoing evolutionary ‘arms race’ where FH  
445 was initially hijacked by *S. aureus* to protect it from complement [46] and then  
446 FHRs (devoid of intrinsic complement regulatory activity) were  
447 evolved/deployed by the host to compete with FH on that surface and restore  
448 complement opsonisation of the pathogen [22]. Perhaps the release/secretion of  
449 Sbi from *S. aureus* is a more recent event in this arms race with the host, which  
450 takes the C3b/C3 convertase binding potential away from the bacterial surface  
451 and leads to local rapid fluid phase consumption of complement, i.e. local  
452 decompensation and bacterial survival/propagation. Our understanding of  
453 the role and complexity of FHRs in immune evasion strategies is still in its  
454 infancy [46], but this study underlines the potency of another strategy in this  
455 process.

456 Using FHR-1 as a ‘model’ dimerization domain containing FHR, structural  
457 analysis of the Sbi-III-IV:C3d:FHR-1 tripartite complex, using SAXS, indeed  
458 suggests the formation of a dimer mediated by FHR-1 domain 1 and 2 and  
459 provides details of the role of the extended unfolded nature of domain III in the  
460 binding of FHR-1 (Figure 4). The molecular basis of the preferential binding of

461 FHR-1 over FH cannot easily be explained on the basis of differences in amino  
462 acid sequence between the two complement regulators, since their C3d binding  
463 regions (SCR 4-5 of FHR-1 and SCR 19-20 of FH) share 99% sequence identity.  
464 However, our SAXS analyses, and binding studies using C3d(g) or iC3b as ligands  
465 (Figures 3 and 4), indicate that the C-terminal regions of FHR proteins are  
466 readily exposed, unlike those of FH that exist in a “latent” conformation with the  
467 C-terminal part of the protein folded back and partially blocked [47-50]. The  
468 dimeric physiological state of FHR-1 and the other FHRs tested in this study is  
469 also likely to enhance their ability, due to increased avidity, to assemble a  
470 tripartite complex.

471

472 Analysis of the hydrodynamic volume of the Sbi-III-IV:C3d complex using  
473 *switchSENSE* highlighted a significant contraction of the normally extended  
474 conformation Sbi-III-IV structure [34] caused by the K173A substitution in  
475 domain III (Table 2). SAXS analysis confirms these findings, showing a partially  
476 kinked N-terminal structure of domain III in K173A with reduced conformational  
477 freedom (Figure 4e-g). The contraction of the Sbi-III-IV structure caused by the  
478 K173A substitution suggests that the normally flexible and extended  
479 conformation of domain III plays an important role in the recruitment of FHRs,  
480 especially FHR-5 into the tripartite complex after the initial interaction between  
481 Sbi-IV and C3b. Previous structural analyses of the Sbi’s domain III, using NMR,  
482 revealed that this domain is indeed natively unfolded [51].

483

484       Based on the structural and functional information described here we  
485 decided to construct a Sbi-III-IV-Ag85b fusion construct that could be used to  
486 test its effect on the immune response against this model antigen *in vivo*. We  
487 chose *Mycobacterium tuberculosis* Ag85b, a fibronectin-binding protein with  
488 mycolyltransferase activity [52], because it is known to be immunogenic and  
489 previously suggested as a vaccine candidate [53]. Indeed, there is evidence that  
490 Ag85b can elicit both humoral and cellular immune reactions in patients with TB,  
491 but there is conflicting evidence of its efficacy as a vaccine [54, 55], suggesting  
492 adjuvants may improve its overall immunogenicity. This target also gives scope  
493 to allow further testing in animal models of disease [56]. Structural analysis,  
494 using Circular Dichroism and SAXS confirmed that secondary structural elements  
495 of both parent proteins have been preserved in the fusion protein construct and  
496 that the crucial functional Sbi domains are accessible for interactions with  
497 complement (Figure 5 and Supporting Figure S5). We also show that the  
498 Sbi-III-IV-Ag85b fusion construct can induce AP activation and is opsonized with  
499 C3 breakdown products (Figure 5c).

500       With AP activation in human and mouse serum confirmed (Figures 5 and 6),  
501 we opted to use straightforward immune response, IgG titre, analysis to  
502 demonstrate the potential of Sbi-III-IV to trigger complement *in vivo* and act as a  
503 vaccine adjuvant in a mouse model, in a similar manner to many previous studies  
504 [57]. Our data herein firstly indicates that Sbi-III-IV can activate mouse

505 complement in an analogous manner to that of the human complement system.  
506 This obviously allows direct analysis of these pro-vaccine compounds in both  
507 mouse and human model systems (a huge advantage to previous C3d based  
508 adjuvants) [13], indeed Sbi-III-IV has acted as a C3 activator in all species tested  
509 thus far (data not shown). As predicted from the *in vitro* work, the opsonisation  
510 of fusion proteins or co-immunised antigen by mouse complement breakdown  
511 fragments results in a significant increase in the immunogenicity of Ag85b, with  
512 increased IgG titres noted in the presence of fused or co-immunised Ag85b  
513 (Figure 6). The adjuvant function both increased the intensity of the response  
514 and the rate of the response when compared to Ag85b immunized alone. We will  
515 need to further explore the potency of this response to that of common adjuvants  
516 and with a mix of target antigens to fully assess the utility of Sbi-III-IV as a  
517 universal vaccine adjuvant. For instance, comparison of the action of Sbi-III-IV to  
518 the Glaxo-Smith-Kline's adjuvant systems, particularly AS01 [58], or to MF59 [59]  
519 may be of key interest and recent approaches may provide ideal pre-clinical  
520 model systems to facilitate this [60, 61] before progression to clinical studies.  
521 The work is ongoing but the data herein demonstrate the initial proof of concept.

522

523 In summary, we have demonstrated that Sbi-III-IV triggers consumption of  
524 complement component C3 via activation of the alternative complement  
525 pathway, by acting as a competitive antagonist of FH via the recruitment of FHRs  
526 into dimeric tripartite complexes that can protect C3b bound to Sbi (Figure 6d).

527 It is likely this provides a stable nidus for alternative pathway mediated C3  
528 convertase generation, i.e. local fluid phase C3bBb generation that overwhelms  
529 any local complement regulators, providing the potential for bystander lysis or  
530 opsonisation of surfaces. Our ability to harness this potential, targeting  
531 complement opsonisation to the surface of an antigen (in this case from  
532 *Mycobacterium*) and therefore use Sbi-III-IV as a vaccine adjuvant clearly  
533 demonstrates Sbi-III-IV has great potential for use with a range of antigens  
534 across multiple species, including humans, although more work remains to make  
535 that a reality.

## 536 **Materials and Methods**

537

### 538 *Proteins, antibodies and sera*

539 Factor H (FH), C3b, factor B (FB), factor D (FD), factor I (FI), properdin (FP),  
540 FI-depleted serum, goat anti-human C3 polyserum and goat anti-human FB  
541 polyserum were purchased from Complement Technologies (Tyler, TX). FHR-1<sub>1-2</sub>,  
542 FHR-1, -2 and -5 used in the tripartite complex reconstruction and binding  
543 competition assay were produced using Chinese Hamster ovary cell culture (as  
544 previously described [62]). Horse radish peroxidase (HRP)-conjugated rabbit  
545 anti-goat immunoglobulin polyserum and HRP-conjugated Streptavidin were  
546 acquired from Sigma Aldrich. HRP-conjugated goat anti-rabbit immunoglobulin  
547 G (Thermo Fisher, catalog no. 815-968-0747), HRP-conjugated rabbit anti-mouse  
548 immunoglobulin G (Thermo Fisher, catalog no. 31452) and biotin-conjugated FH  
549 monoclonal antibody OX24 (catalog no. MA5-17735) were purchased from  
550 Thermo Fisher Scientific. The goat anti-human FH polyclonal serum (catalog no.  
551 341276-1ml) that was previously used to detect human FH and FHR-1 was  
552 purchased from Merck Millipore. Human C3 was purified from mixed pool  
553 citrated human plasma (TCS Bioscience, PR100) using polyethylene glycol 4000  
554 precipitation, anion and cation exchange chromatography as previously  
555 described [63]. A pET15b-C3d construct was acquired from Prof. David E.  
556 Isenman and transformed into *Escherichia coli* (*E. coli*) strain BL21 (DE3),  
557 recombinant C3d was then expressed and purified using a previously described

558 protocol [64]. Lyophilized normal human serum (NHS) was purchased from Euro  
559 Diagnostica (catalog no. PC300). Additional proteins and antibodies are  
560 described in the specific experimental sections.

561

#### 562 *Sbi-III-IV constructs*

563 The expression and purification of the N-terminally 6×His tagged recombinant  
564 Sbi-III-IV from a pQE30:*sbi-III-IV* construct were described previously [24].

565

#### 566 *Sbi-III-IV mutagenesis*

567 Mutations in the Sbi-III-IV sequence were introduced using the QuikChange II XL  
568 site-directed mutagenesis kit (Agilent Technologies), the primers used are listed  
569 in Supplementary Table S1. The mutated pQE30:*sbi-III-IV* plasmids were  
570 sequenced to confirm the success of the mutagenesis. SDS-PAGE profiles of all  
571 the Sbi-III-IV mutant proteins used in this study are shown in Supplementary  
572 Figure S1.

573

#### 574 *Sbi-III-IV induced C3 consumption assay*

575 Lyophilized NHS was re-suspended in chilled dH<sub>2</sub>O to a 2× concentration. Equal  
576 volumes of 2×NHS and Sbi (10 μM) were combined. Sbi treated sera were then  
577 incubated in a thermocycler at 37°C for 30 min. Treated serum samples were  
578 collected at time intervals, 0.5 μl of serum was loaded on an SDS-PAGE gel  
579 analyzed under reducing condition. The proteins were Western blotted, and the

580 blots were probed with anti-C3d, anti-Sbi, anti-C3a or anti-factor B antibodies.

581

582 A hemolytic assay was modified from a previously published procedure [65] to  
583 measure Sbi induced consumption of C3. Briefly, rabbit erythrocytes (TCS  
584 Bioscience) were resuspended in GVB buffer (5 mM veronal, 145 mM NaCl, 10  
585  $\mu$ M EDTA, 0.1 % (w/v) gelatin) by washing three times via centrifugation at 600  
586  $g$  for 6 mins. The concentration of rabbit red cells to be used in each experiment  
587 was determined by adding a stock of 5  $\mu$ l of erythrocytes to 245  $\mu$ l of water to  
588 give complete lysis and then re-adjusting cell concentration until an optical  
589 density reading of 0.7 ( $A_{405}$ ) was reached. Lysis experiments were conducted in  
590 two steps, first, 15  $\mu$ l of NHS, 5  $\mu$ l of  $Mg^{2+}$ -EGTA (70 mM  $MgCl_2$  and 100 mM  
591 EGTA), 20  $\mu$ l of protein in E2 buffer was mixed and pre-incubated at 37 °C for 30  
592 mins. Subsequently, 5  $\mu$ l of rabbit erythrocyte was added and incubated for an  
593 additional 30 mins at 37 °C. At the end of the incubation, 150  $\mu$ l of quenching  
594 buffer (GVB supplemented with 10 mM EDTA) was added. The cells were  
595 pelleted by centrifugation at 1500 $g$  for 10 min, and absorbance ( $A_{405}$ ) of 100  $\mu$ l  
596 of supernatant measured. Post-consumption lysis percentage was calculated as  
597  $100 \times ((A_{405} \text{ test sample} - A_{405} \text{ 0\% control}) / (A_{405} \text{ 100\%} - A_{405} \text{ 0\% control}))$ .

598

599 *In vitro complement activation using Sbi III/IV-Ag85b in mouse serum*

600 Mouse serum was collected from male *Cr2<sup>-/-</sup>* mice by cardiac puncture and

601 allowed to clot fully on ice for 4 hours followed by separation of serum by



602 centrifugation at 2000g in a refrigerated centrifuge. Serum was then mixed with  
603 Sbi III/IV or Sbi III/IV-Ag85b, ensuring that the amount of Sbi III/IV in each  
604 preparation was equivalent. The reaction was stopped at 0, 30, 60 and 120  
605 minutes, by the addition of reducing sample buffer, boiled for 5 min and analysed  
606 on a 10% SDS-PAGE gel. After transfer to nitrocellulose the blots were probed  
607 with Rabbit anti-C3d (1/1000, DAKO, A0063) and Goat anti-Rabbit-HRPO  
608 (1/2000, 111-035-046-JIR, Stratech), developed with ECL substrate (Pierce) and  
609 exposed to X-Ray film for 2 min.

610

#### 611 *switchSENSE kinetic analysis*

612 A switchSENSE DRX 2400 instrument (Dynamic Biosensors) was used to  
613 characterize the binding kinetics and protein size changes based on *switchSENSE*  
614 technology [66, 67]. Purified Sbi-III-IV-cys, K173A, R231A and their ligand C3d  
615 were sent to Dynamic Biosensor's protein analyzing facility for binding kinetic  
616 and hydrodynamic diameter analysis. In the case of a protein binding event,  
617 based on the real-time measurements of the switching dynamics in a range of  
618 ligand concentrations, binding rate constants ( $k_{ON}$  and  $k_{OFF}$ ) and dissociation  
619 constants ( $K_D$ ) can be analysed [67]. Alternatively, under saturated binding  
620 conditions, the switching dynamic of the protein (or protein complex) can be  
621 compared with the switching dynamics of bare DNA and with a biophysical  
622 model with which the size of the immobilized protein (or protein complex) can  
623 be determined. For determination of Sbi-III-IV:C3d binding kinetic parameters,

624 130 nM, 100 nM, 70 nM and 40 nM of C3d were applied sequentially onto the  
625 Sbi-III-IV immobilized microchip. All Sbi:C3d complexes' hydrodynamic  
626 diameters were estimated at a C3d concentration of 130 nM.

627

#### 628 *Fluorometric assay*

629 Fluorometric C3b breakdown assay was performed using a black 96 well  
630 microplate (Thermofisher, M33089) in a TECAN Spark 20M  
631 temperature-controlled fluorescence plate reader. Excitation was at 386 nm and  
632 emission was recorded at 475 nm with a 20-nm bandwidth. The control C3b  
633 breakdown rate, performed in PBS, contained 100  $\mu$ l of 1  $\mu$ M C3b, 160 nM FH, 17  
634 nM of FI and 10  $\mu$ M ANS, and was scanned every 5 s for 15 min. To study the  
635 interruption of C3b breakdown, 32 nM of FHR was either added alone or in  
636 combination with 1  $\mu$ M of Sbi-III-IV. Data were collected at 25°C, normalized by  
637 Excel using the equation "Percentage of C3b= $((F_x - (F_{15min})) / (F_{15min} - F_{0min})) * 100$ "  
638 and plotted by Graphpad Prism.

639

#### 640 *Small angle X-ray scattering*

641 Synchrotron radiation X-ray scattering from solutions of the  
642 Sbi-III-IV:C3d:FHR-1 tripartite complex, the Sbi-III-IV(K173A):C3d complex, and  
643 the Sbi-III-IV-Ag85b fusion protein were collected at the EMBL P12 beamline of  
644 the storage ring PETRA III (DESY, Hamburg, Germany). Images were collected  
645 using a photon counting Pilatus-2M detector and a sample to detector distance of

646 3.1 m and a wavelength ( $\lambda$ ) of 0.12 nm covering the range of momentum transfer  
647 ( $s$ )  $0.1 < s < 4.5 \text{ nm}^{-1}$ ; with  $s=4\pi s\sin\theta/\lambda$ . Different solute concentrations were  
648 measured using a continuous flow cell capillary. To monitor radiation damage,  
649 20 successive 50 ms exposures were compared and frames displaying significant  
650 alterations were discarded. The data were normalized to intensity of the  
651 transmitted beam and radially averaged; the scattering of the buffer was  
652 subtracted, and the different curves were scaled for solute concentration. The  
653 forward scattering  $I(0)$ , the radius of gyration ( $R_g$ ) along with the probability  
654 distribution of the particle ( $p(r)$ ) and the maximal dimension ( $D_{\max}$ ) were  
655 computed using the automated SAXS data analysis pipeline SASFLOW [68].

656 For the Sbi-III-IV-Ag85b fusion protein data quality was improved with  
657 SEC-SAXS mode and the parallel analysis of light scattering data in a similar  
658 manner as described in Gräwert *et al.* [69]. Frames comprising solely the  
659 monomeric version of the fusion protein were averaged and used for further  
660 processing after background subtraction.

661 The molecular masses (MM) were evaluated by comparison of the forward  
662 scattering with that from a reference solution of BSA and based on the Porod  
663 volumes of the constructs. With SAXS, the former estimation of MM is within an  
664 error of 10%, provided the sample and standard concentrate are determined  
665 accurately. DAMMIF was used to compute the *ab initio* shape models. For this, 10  
666 independent models fitting the experimental scattering curves were generated  
667 and compared to each other. More detailed modelling was obtained with Coral.

668 Here, existing partial crystal structure of the Sbi-IV:C3d complex was extended  
669 with 60 additional beads placed at the N-terminus of Sbi-IV to mimic the missing  
670 Sbi-III domain. Here too, 10 independent runs were performed, and the degree of  
671 variation addressed. Further analysis of the flexibility of the samples was  
672 addressed with Ensemble Optimization Method (EOM). For this, ensembles of  
673 models with variable conformations are selected from a pool of randomly  
674 generated models such that the scattering from the ensemble fits the  
675 experimental data, and the distributions of the overall parameters (e.g.  $D_{\max}$ ) in  
676 the selected pool are compared to the original pool.

677 The proteins in the Sbi-III-IV:C3d:FHR-1 tripartite complex were combined  
678 1:1:1 at a concentration of 45  $\mu\text{M}$ . The Sbi-III-IV(K173A):C3d complex were  
679 formed at a 1:1 ratio at 240  $\mu\text{M}$  (12 mg/ml). PDB structure 2wy8 (Sbi-IV:C3d  
680 complex) was used to model the complex using and compared with SAXS data  
681 previously recorded [34]. The Sbi-III-IV-Ag85b fusion protein was provided at 29,  
682 72 and 145  $\mu\text{M}$  concentrations (1.45, 3.6 and 7.2 mg/ml, respectively). The  
683 samples were dialysed against PBS, which was also used for background  
684 subtraction. From all samples concentration series were measured to exclude  
685 any concentration dependent alterations.

686

### 687 *Surface Plasmon Resonance*

688 Tripartite complexes were analyzed by surface plasmon resonance (SPR)  
689 technology using a Biacore S200 (GE Healthcare). All experiments were

690 conducted at 25°C on CM5 chips, using HBST (10 mM HEPES, 150 mM NaCl, and  
691 0.005% Tween 20, pH 7.4) as running buffer, which was optionally  
692 supplemented with 1mM of MgCl<sub>2</sub> (HBST<sup>+</sup>) to be compatible with AP  
693 amplification condition. On the chip surface 800 RU of C3b was opsonized via AP  
694 C3 convertase through a method described before [70, 71]. The iC3b surface was  
695 produced by injecting of repetitive cycles of FH and FI across a C3b opsonized  
696 surface, the completeness of the conversion was confirmed by the inability of FB  
697 binding. A separate chip surface was made by amine coupling 600 RU of  
698 recombinant C3d (CompTech, USA). In all SPR experiments, response differences  
699 were derived using the signal from a flow cell to subtract the parallel reading  
700 from a reference flow cell that blocked with carbodiimide, *N*-hydroxysuccinimide  
701 and ethanolamine. Analytes were injected in duplicate (at 30 µl/min for 200 s)  
702 followed by running buffer for 300 s and a regeneration phase involving injection  
703 of regeneration buffer (10 mM sodium acetate, 1 M NaCl pH 4.0) for 60 s. To  
704 analyze Sbi-III-IV binding and the assembly of tripartite complex, concentration  
705 series of Sbi-III-IV WT or K173A were flowed cross separately or co-injected  
706 with FH, FHR-1, FHR-2, FHR-5 or FH<sub>19-20</sub> at a fixed concentration (100, 12.5, 20,  
707 25 or 20 nM respectively).

708

709 The C3 convertase DAA assay was performed on a CM5 chip amine coupled with  
710 500 RU C3b, using HBST<sup>+</sup> as running buffer throughout. A mixture of analytes for  
711 building C3 convertase were flowed across, including FB and FD in addition to

712 various FH reagent combinations (FH or FH and FHR-1 or FH, FHR-1 and -5). The  
713 various FH reagents combinations were also flow across separately in order to  
714 derive the sensorgram for C3 convertase. To examining Sbi bound C3 convertase,  
715 2  $\mu$ M of wild-type Sbi-III-IV was added to the mixture of analytes for building C3  
716 convertase. The various FH reagent combinations spiked with Sbi were flowed  
717 across separately in order to derive the sensorgram for Sbi bound C3 convertase.  
718 Each injection cycle includes Injection of the C3 convertase mixture for 200-300  
719 s, followed by running buffer for 300-400 s and two consecutive 60 s  
720 regeneration phases.

721

#### 722 *FH/FHR-1 Competition assay*

723 C3b was diluted in carbonate buffer (pH 9.5) and coated on to wells of a Nunc  
724 MaxiSorp plate (0.25  $\mu$ g/well) for 16 h at 4°C. The wells were blocked with PBST  
725 (PBS with 0.1% Tween 20) supplemented with and 2% BSA for 1 h at 37 °C, and  
726 then washed with PBST buffer. Doubly diluted concentration series (9-600 nM)  
727 of FHRs, FH<sub>19-20</sub>, FHR-1<sub>1-2</sub> in PBST-2% BSA were then added to the wells,  
728 together with a constant concentration of FH (25 nM) and Sbi-III-IV (1000 nM).  
729 The plate was incubated for 1 h at 37 °C, then washed with PBST. 50  $\mu$ l of  
730 monoclonal anti-FH antibody OX-24 (specific to the FH SCR domain 5) diluted  
731 with PBS-2% BSA (0.6  $\mu$ g/ml) was added to the wells and the plate incubated for  
732 a further 1 h. The wells were washed with PBST, and 50  $\mu$ l sheep anti-mouse IgG  
733 (1:5000 dilution in PBST-2% BSA) was added to the wells for 1 h at 37 °C. The

734 wells were washed again and the conjugate was detected using TMB ELISA  
735 substrate solution, which was added to the wells for 5 min. The colour reaction  
736 was stopped by 10% H<sub>2</sub>SO<sub>4</sub> and the plate was read at A<sub>450</sub> using a plate reader.

737

### 738 *Design and purification of the Sbi-III-IV-Ag85b fusion construct*

739 The DNA sequence coding for Sbi-III-IV (*sbi*<sub>448-798</sub>) was fused to the 5' end of the  
740 DNA sequence for Ag85b (*ag85b*<sub>121-975</sub>) via a linker region of 84 bp  
741 (Supplementary Figure S6). The fusion gene was commercially synthesized and  
742 ligated into the pET15b vector, containing an ampicillin resistance cassette and a  
743 T7 promoter. The pET15b:*sbi-III-IV-ag85b* plasmid was verified using  
744 sequencing, and the resulting construct encoded an N-terminally his-tagged  
745 Sbi-III-IV-Ag85b protein. *E. coli* BL21 (DE3) cells harbouring the  
746 pET15b:*sbi-III-IV-ag85b* plasmid were grown in LB broth supplemented with  
747 100 µg/ml ampicillin to an A<sub>600</sub> = 0.4-0.6. Protein expression was induced with  
748 0.5 mM IPTG and by incubating the cells at 17°C for 16 h. Bacteria were  
749 harvested, lysed using sonication (80% amplitude, for six 10 s bursts) in the  
750 presence of protease inhibitor cocktail (set VII-Calbiochem, Merck), and the  
751 protein initially purified using nickel-affinity chromatography (His-Trap column,  
752 GE Healthcare) with a gradient of 0-0.5 M imidazole in 50 mM Tris, 150 mM NaCl,  
753 pH 7.4. It was further purified using size-exclusion chromatography (Hi-Load  
754 16/60 Superdex S200 column, GE Healthcare) equilibrated in 20 mM Tris, 150  
755 mM NaCl, pH 7.4. Fractions containing protein were pooled and concentrated.

756 Protein concentration was measured at  $A_{280}$ .

757

758 *Analysis of Sbi-III-IV-Ag85b fusion protein AP complement activity*

759 Alternative pathway (AP) activity of Sbi III-IV-Ag85b-treated NHS samples was

760 analysed using the ELISA-based WIESLAB® (Euro Diagnostica) complement

761 system AP assay. Sbi-III-IV-Ag85b was mixed with normal human serum (NHS)

762 at a 1:1 volume ratio and incubated for 30 min at 37 °C in a thermal cycler.

763 Treated serum was then diluted with AP diluent (blocking the activation of the

764 other two complement pathways) by 1 in 20. From this point the manufacturer's

765 instructions were followed. A blank (AP diluent), positive control (NHS) and

766 negative control (heat-inactivated NHS) were also recorded. Complement

767 activation was converted to residual AP activity (%) using the equation: (sample

768 - negative control)/(positive control - negative control) x 100.

769

770 *C3 fragment deposition on Sbi-III-IV-Ag85b fusion protein*

771 The method used is similar to that described for WT Sbi-III-IV. Lyophilised NHS

772 (Euro Diagnostica) was re-suspended in chilled dH<sub>2</sub>O. Sbi-III-IV-Ag85b (100 μM)

773 was mixed with NHS in a 1:1 ratio, and incubated for 1 h at 37 °C in a

774 thermocycler. Samples were taken at regular intervals (0, 5, 15, 30, 60 min), and

775 separated by SDS-PAGE followed by Western blot analysis using either rabbit

776 anti-Sbi (1.5: 5000 dilution), rabbit anti-C3d (1.5:5000 dilution) or mouse

777 anti-Ag85b (1:1000 dilution) polyclonal antibodies and detected using



778 HRP-conjugated secondary antibodies (1:2500 goat anti rabbit or 1:1000 goat  
779 anti mouse). NHS-only was used as a negative control.

780

781 *Measurement of immune response to Sbi-III-IV-Ag85b fusion protein*

782 Eight week old male mice (wild-type C57bl/6, C3<sup>-/-</sup> and Cr2<sup>-/-</sup>) were bled by tail  
783 vein venesection at day -2. Mice were then immunized at day 0 with molar  
784 equivalent doses of Ag85b alone (2µg), Sbi-III-IV-Ag85b (fusion protein),  
785 Sbi-III-IV alone or a mixture of Sbi-III-IV and Ag85b, as appropriate. Mice were  
786 then bled weekly thereafter and plasma stored at -80°C until required for batch  
787 analysis. Mice were boosted at day 28 and sacrificed at day 42.

788 For analysis of IgG response to Ag85b by ELISA, 96 well plates (NUNC maxisorb)  
789 were coated with 1 µg/ml Ag85b (Abcam, UK) or 1.35 µg/ml Sbi III/IV-Ag85b in  
790 carbonate buffer at 50 µl per well and incubated at 4°C for 16 h. Plates were  
791 washed with 0.01% PBS-Tween and a 1% BSA blocking solution was applied for  
792 1 h at 20°C. Serum samples were diluted to 1/50 or 1/100 in 0.01% PBS-Tween,  
793 added at 50 µl per well and incubated for 1 h at 20°C. Plates were washed and  
794 secondary antibody (sheep anti mouse IgG-HRPO, 515-035-071-JIR, Stratech, UK)  
795 was added at 1/100 dilution, 50 µl per well and incubated for 1 h at 20°C. TMB  
796 substrate (50 µl per well) was added and allowed to develop for 6 min. The  
797 reaction was stopped by the addition of 100 µl 10% H<sub>2</sub>SO<sub>4</sub> per well and plates  
798 were read at A<sub>450</sub>. A mouse monoclonal anti-Ag85b (Abcam, ab43019) used as a  
799 positive control. The mean absorbance ± SEM of each mouse group is shown.

800 Data for each mouse, at time 0, has been normalized to the day 0 average

801 reactivity to Ag85b in all mice screened.

## 802 **Acknowledgements**

803 This research was funded by the Biotechnology and Biological Sciences Research  
804 Council (BBSRC Follow On Fund BB/N022165/1, awarded to JvdE and KJM).

805 AAW was supported by a PhD scholarship granted Raoul and Catherine Hughes  
806 and the University of Bath Alumni. KJM, HD and RW were also supported by the  
807 MRC and Newcastle University's Confidence in Concept funding. AS thanks  
808 the Royal Society URF and Alumni Fund at the University of Bath for funding.

809 MAG was supported by the EMBL interdisciplinary Postdoc Programme under  
810 Marie Curie COFUND Actions as well as the Horizon 2020 programme of the  
811 European Union, iNEXT (H2020 Grant # 653706).

812

## 813 **Author Contributions**

814 JvdE, AGW and KJM conceived the idea of the project. YY, KJM and JvdE designed  
815 the experiments. YY, CRB, AAW, RK and JP performed and analysed the  
816 experiments. KW and WK conducted and analysed the *switch*SENSE experiments.

817 MAG and DIS conducted SAXS experiments and oversaw the structural analysis.

818 RK, JP and KJM conducted the *in vivo* experiments. AS and AW significantly

819 contributed to the discussions about the overall project. YY, CRB, KJM and JvdE

820 wrote and edited the manuscript, with significant contributions from AAW, MAG

821 and DIS.

822

## 823 **Competing Financial Interests**

824 KW and WK are employed by Dynamic Biosensors GmbH

825 KJM is a member of the scientific advisory board of Gemini Therapeutics, Inc,

826 Cambridge, Massachusetts, USA.

827

828 **Data availability**

829 All data generated or analysed during this study are included in this published

830 article (and its supplementary information files).

831

## 832 References

- 833 1. Green, T.D., et al., *C3d enhancement of neutralizing antibodies to measles*  
834 *hemagglutinin*. Vaccine, 2001. **20**(1-2): p. 242-8.
- 835 2. Ross, G.D., *Regulation of the adhesion versus cytotoxic functions of the*  
836 *Mac-1/CR3/alphaMbeta2-integrin glycoprotein*. Crit Rev Immunol, 2000.  
837 **20**(3): p. 197-222.
- 838 3. Dempsey, P.W., et al., *C3d of complement as a molecular adjuvant: bridging*  
839 *innate and acquired immunity*. Science, 1996. **271**(5247): p. 348-50.
- 840 4. Fang, Y., et al., *Expression of complement receptors 1 and 2 on follicular*  
841 *dendritic cells is necessary for the generation of a strong antigen-specific*  
842 *IgG response*. J Immunol, 1998. **160**(11): p. 5273-9.
- 843 5. Carroll, M.C. and D.E. Isenman, *Regulation of humoral immunity by*  
844 *complement*. Immunity, 2012. **37**(2): p. 199-207.
- 845 6. Roozendaal, R. and M.C. Carroll, *Complement receptors CD21 and CD35 in*  
846 *humoral immunity*. Immunol Rev, 2007. **219**: p. 157-66.
- 847 7. Popi, A.F., I.M. Longo-Maugeri, and M. Mariano, *An Overview of B-1 Cells as*  
848 *Antigen-Presenting Cells*. Frontiers in immunology, 2016. **7**: p. 138.
- 849 8. Chan, O.T., M.P. Madaio, and M.J. Shlomchik, *B cells are required for lupus*  
850 *nephritis in the polygenic, Fas-intact MRL model of systemic autoimmunity*.  
851 J Immunol, 1999. **163**(7): p. 3592-6.
- 852 9. Ron, Y., et al., *Defective induction of antigen-reactive proliferating T cells in*  
853 *B cell-deprived mice*. Eur J Immunol, 1981. **11**(12): p. 964-8.
- 854 10. Ron, Y., et al., *Defective induction of antigen-reactive proliferating T cells in*  
855 *B cell-deprived mice. II. Anti-mu treatment affects the initiation and*  
856 *recruitment of T cells*. Eur J Immunol, 1983. **13**(2): p. 167-71.
- 857 11. De Groot, A.S., et al., *C3d adjuvant effects are mediated through the*  
858 *activation of C3d-specific autoreactive T cells*. Immunol Cell Biol, 2015.  
859 **93**(2): p. 189-97.
- 860 12. Carter, R.H. and D.T. Fearon, *Polymeric C3dg primes human B lymphocytes*  
861 *for proliferation induced by anti-IgM*. J Immunol, 1989. **143**(6): p.  
862 1755-60.
- 863 13. He, Y.G., et al., *A novel C3d-containing oligomeric vaccine provides insight*  
864 *into the viability of testing human C3d-based vaccines in mice*.  
865 Immunobiology, 2018. **223**(1): p. 125-134.
- 866 14. van den Elsen, J.M. and D.E. Isenman, *A crystal structure of the complex*  
867 *between human complement receptor 2 and its ligand C3d*. Science, 2011.  
868 **332**(6029): p. 608-11.
- 869 15. Janssen, B.J., et al., *Structures of complement component C3 provide insights*  
870 *into the function and evolution of immunity*. Nature, 2005. **437**(7058): p.  
871 505-11.
- 872 16. Janssen, B.J., et al., *Structure of C3b reveals conformational changes that*  
873 *underlie complement activity*. Nature, 2006. **444**(7116): p. 213-6.
- 874 17. Forneris, F., et al., *Structures of C3b in complex with factors B and D give*

- 875 *insight into complement convertase formation*. Science, 2010. **330**(6012):  
876 p. 1816-20.
- 877 18. Wu, J., et al., *Structure of complement fragment C3b-factor H and*  
878 *implications for host protection by complement regulators*. Nat Immunol,  
879 2009. **10**(7): p. 728-33.
- 880 19. Morgan, H.P., et al., *Structural basis for engagement by complement factor*  
881 *H of C3b on a self surface*. Nat Struct Mol Biol, 2011. **18**(4): p. 463-70.
- 882 20. Kajander, T., et al., *Dual interaction of factor H with C3d and*  
883 *glycosaminoglycans in host-nonhost discrimination by complement*. Proc  
884 Natl Acad Sci U S A, 2011. **108**(7): p. 2897-902.
- 885 21. Goicoechea de Jorge, E., et al., *Dimerization of complement factor H-related*  
886 *proteins modulates complement activation in vivo*. Proceedings of the  
887 National Academy of Sciences, 2013. **110**(12): p. 4685-4690.
- 888 22. Jozsi, M., et al., *Factor H-related proteins determine complement-activating*  
889 *surfaces*. Trends Immunol, 2015. **36**(6): p. 374-84.
- 890 23. Xue, X., et al., *Regulator-dependent mechanisms of C3b processing by factor*  
891 *I allow differentiation of immune responses*. Nat Struct Mol Biol, 2017.  
892 **24**(8): p. 643-651.
- 893 24. Burman, J.D., et al., *Interaction of human complement with Sbi, a*  
894 *staphylococcal immunoglobulin-binding protein indications of a novel*  
895 *mechanism of complement evasion by Staphylococcus aureus*. Journal of  
896 Biological Chemistry, 2008. **283**(25): p. 17579-17593.
- 897 25. Smith, E.J., et al., *The immune evasion protein Sbi of Staphylococcus aureus*  
898 *occurs both extracellularly and anchored to the cell envelope by binding*  
899 *lipoteichoic acid*. Molecular Microbiology, 2012. **83**(4): p. 789-804.
- 900 26. Haupt, K., et al., *The Staphylococcus aureus Protein Sbi Acts as a*  
901 *Complement Inhibitor and Forms a Tripartite Complex with Host*  
902 *Complement Factor H and C3b*. Plos Pathogens, 2008. **4**(12 ).
- 903 27. Csincsi, A.I., et al., *Factor H-related protein 5 interacts with pentraxin 3 and*  
904 *the extracellular matrix and modulates complement activation*. J Immunol,  
905 2015. **194**(10): p. 4963-73.
- 906 28. van Beek, A.E., et al., *Factor H-Related (FHR)-1 and FHR-2 Form Homo- and*  
907 *Heterodimers, while FHR-5 Circulates Only As Homodimer in Human*  
908 *Plasma*. Front Immunol, 2017. **8**: p. 1328.
- 909 29. Isenman, D.E., et al., *Nucleophilic modification of human complement*  
910 *protein C3: correlation of conformational changes with acquisition of*  
911 *C3b-like functional properties*. Biochemistry, 1981. **20**(15): p. 4458-67.
- 912 30. Pangburn, M.K. and H.J. Muller-Eberhard, *Kinetic and thermodynamic*  
913 *analysis of the control of C3b by the complement regulatory proteins factors*  
914 *H and I*. Biochemistry, 1983. **22**(1): p. 178-85.
- 915 31. McRae, J.L., et al., *Human factor H-related protein 5 has cofactor activity,*  
916 *inhibits C3 convertase activity, binds heparin and C-reactive protein, and*  
917 *associates with lipoprotein*. Journal of immunology (Baltimore, Md : 1950),  
918 2005. **174**(10): p. 6250-6.

- 919 32. Tria, G., et al., *Advanced ensemble modelling of flexible macromolecules*  
920 *using X-ray solution scattering*. IUCrJ, 2015. **2**(Pt 2): p. 207-17.
- 921 33. Morgan, H.P., et al., *Structural analysis of the C-terminal region (modules*  
922 *18-20) of complement regulator factor H (FH)*. PLoS One, 2012. **7**(2): p.  
923 e32187.
- 924 34. Clark, E.A., et al., *A structural basis for Staphylococcal complement*  
925 *subversion: X-ray structure of the complement-binding domain of*  
926 *Staphylococcus aureus protein Sbi in complex with ligand C3d*. Molecular  
927 Immunology, 2011. **48**(4): p. 452-462.
- 928 35. Franke, D. and D.I. Svergun, *DAMMIF, a program for rapid ab-initio shape*  
929 *determination in small-angle scattering*. Journal of Applied  
930 Crystallography, 2009. **42**: p. 342-346.
- 931 36. Tuukkanen, A.T., G.J. Kleywegt, and D.I. Svergun, *Resolution of ab initio*  
932 *shapes determined from small-angle scattering*. IUCrJ, 2016. **3**(Pt 6): p.  
933 440-447.
- 934 37. Petoukhov, M.V., et al., *New developments in the ATSAS program package*  
935 *for small-angle scattering data analysis*. Journal of Applied  
936 Crystallography, 2012. **45**: p. 342-350.
- 937 38. Pepys, M.B., *Role of complement in induction of antibody production in vivo.*  
938 *Effect of cobra factor and other C3-reactive agents on thymus-dependent*  
939 *and thymus-independent antibody responses*. J Exp Med, 1974. **140**(1): p.  
940 126-45.
- 941 39. Fearon, D.T. and R.H. Carter, *The CD19/CR2/TAPA-1 complex of B*  
942 *lymphocytes: linking natural to acquired immunity*. Annu Rev Immunol,  
943 1995. **13**: p. 127-49.
- 944 40. Wessels, M.R., et al., *Studies of group B streptococcal infection in mice*  
945 *deficient in complement component C3 or C4 demonstrate an essential role*  
946 *for complement in both innate and acquired immunity*. Proc Natl Acad Sci U  
947 S A, 1995. **92**(25): p. 11490-4.
- 948 41. Ahearn, J.M., et al., *Disruption of the Cr2 locus results in a reduction in B-1a*  
949 *cells and in an impaired B cell response to T-dependent antigen*. Immunity,  
950 1996. **4**(3): p. 251-62.
- 951 42. Lee, Y., et al., *Complement component C3d-antigen complexes can either*  
952 *augment or inhibit B lymphocyte activation and humoral immunity in mice*  
953 *depending on the degree of CD21/CD19 complex engagement*. J Immunol,  
954 2005. **175**(12): p. 8011-23.
- 955 43. Suradhat, S., et al., *Fusion of C3d molecule with bovine rotavirus VP7 or*  
956 *bovine herpesvirus type 1 glycoprotein D inhibits immune responses*  
957 *following DNA immunization*. Vet Immunol Immunopathol, 2001. **83**(1-2):  
958 p. 79-92.
- 959 44. Fries, L.F., et al., *C3b covalently bound to IgG demonstrates a reduced rate*  
960 *of inactivation by factors H and I*. Journal of Experimental Medicine, 1984.  
961 **160**(6): p. 1640-1655.
- 962 45. Lutz, H.U. and E. Jelezarova, *Complement amplification revisited*. Molecular



- 963 Immunology, 2006. **43**(1-2): p. 2-12.
- 964 46. Jozsi, M., *Factor H Family Proteins in Complement Evasion of*  
965 *Microorganisms*. Front Immunol, 2017. **8**: p. 571.
- 966 47. Aslam, M. and S.J. Perkins, *Folded-back solution structure of monomeric*  
967 *factor H of human complement by synchrotron X-ray and neutron*  
968 *scattering, analytical ultracentrifugation and constrained molecular*  
969 *modelling*. J Mol Biol, 2001. **309**(5): p. 1117-38.
- 970 48. Oppermann, M., et al., *The C-terminus of complement regulator Factor H*  
971 *mediates target recognition: evidence for a compact conformation of the*  
972 *native protein*. Clin Exp Immunol, 2006. **144**(2): p. 342-52.
- 973 49. Okemefuna, A.I., et al., *The regulatory SCR-1/5 and cell surface-binding*  
974 *SCR-16/20 fragments of factor H reveal partially folded-back solution*  
975 *structures and different self-associative properties*. J Mol Biol, 2008. **375**(1):  
976 p. 80-101.
- 977 50. Makou, E., A.P. Herbert, and P.N. Barlow, *Functional anatomy of*  
978 *complement factor H*. Biochemistry, 2013. **52**(23): p. 3949-62.
- 979 51. Upadhyay, A., et al., *Structure-Function Analysis of the C3 Binding Region of*  
980 *Staphylococcus aureus Immune Subversion Protein Sbi*. Journal of  
981 Biological Chemistry 2008. **283**(32): p. 22113-22120.
- 982 52. Belisle, J.T., et al., *Role of the major antigen of Mycobacterium tuberculosis*  
983 *in cell wall biogenesis*. Science, 1997. **276**(5317): p. 1420-2.
- 984 53. Palma, C., et al., *The Ag85B protein of Mycobacterium tuberculosis may turn*  
985 *a protective immune response induced by Ag85B-DNA vaccine into a potent*  
986 *but non-protective Th1 immune response in mice*. Cell Microbiol, 2007.  
987 **9**(6): p. 1455-65.
- 988 54. Weinrich Olsen, A., et al., *Protection of mice with a tuberculosis subunit*  
989 *vaccine based on a fusion protein of antigen 85b and esat-6*. Infect Immun,  
990 2001. **69**(5): p. 2773-8.
- 991 55. Olsen, A.W., et al., *Protective effect of a tuberculosis subunit vaccine based*  
992 *on a fusion of antigen 85B and ESAT-6 in the aerosol guinea pig model*.  
993 Infect Immun, 2004. **72**(10): p. 6148-50.
- 994 56. Horwitz, M.A., et al., *Protective immunity against tuberculosis induced by*  
995 *vaccination with major extracellular proteins of Mycobacterium*  
996 *tuberculosis*. Proc Natl Acad Sci U S A, 1995. **92**(5): p. 1530-4.
- 997 57. Toapanta, F.R. and T.M. Ross, *Complement-mediated activation of the*  
998 *adaptive immune responses: role of C3d in linking the innate and adaptive*  
999 *immunity*. Immunol Res, 2006. **36**(1-3): p. 197-210.
- 1000 58. Montoya, J., et al., *A randomized, controlled dose-finding Phase II study of*  
1001 *the M72/AS01 candidate tuberculosis vaccine in healthy PPD-positive*  
1002 *adults*. J Clin Immunol, 2013. **33**(8): p. 1360-75.
- 1003 59. Seo, Y.B., et al., *Comparison of the immunogenicity and safety of the*  
1004 *conventional subunit, MF59-adjuvanted, and intradermal influenza*  
1005 *vaccines in the elderly*. Clin Vaccine Immunol, 2014. **21**(7): p. 989-96.
- 1006 60. Kirkling, M.E., et al., *Notch Signaling Facilitates InVitro Generation of*



- 1007 *Cross-Presenting Classical Dendritic Cells*. Cell reports, 2018. **23**(12): p.  
1008 3658-3672.e6.
- 1009 61. Cytlak, U., et al., *Ikaros family zinc finger 1 regulates dendritic cell*  
1010 *development and function in humans*. Nature communications, 2018. **9**(1):  
1011 p. 1239.
- 1012 62. Nichols, E.M., et al., *An extended mini-complement factor H molecule*  
1013 *ameliorates experimental C3 glomerulopathy*. Kidney International, 2015.  
1014 **88**(6): p. 1314-1322.
- 1015 63. Alsenz, J., et al., *Phylogeny of the third component of complement, C3:*  
1016 *analysis of the conservation of human CR1, CR2, H, and B binding sites,*  
1017 *concanavalin A binding sites, and thiolester bond in the C3 from different*  
1018 *species*. Developmental and Comparative Immunology, 1992. **16**(1): p.  
1019 63-76.
- 1020 64. Nagar, B., et al., *X-ray crystal structure of C3d: a C3 fragment and ligand for*  
1021 *complement receptor 2*. Science, 1998. **280**(5367): p. 1277-1281.
- 1022 65. Kerr, H., et al., *Disease-linked mutations in factor H reveal pivotal role of*  
1023 *cofactor activity in self-surface-selective regulation of complement*  
1024 *activation*. The Journal of biological chemistry, 2017. **292**(32): p.  
1025 13345-13360.
- 1026 66. Langer, A., et al., *Protein analysis by time-resolved measurements with an*  
1027 *electro-switchable DNA chip*. Nature Communications, 2013. **4**: p. 1-8.
- 1028 67. Knezevic, J., et al., *Quantitation of Affinity, Avidity, and Binding Kinetics of*  
1029 *Protein Analytes with a Dynamically Switchable Biosurface*. Journal of the  
1030 American Chemical Society, 2012. **134**(37): p. 15225-15228.
- 1031 68. Franke, D., A.G. Kikhney, and D.I. Svergun, *Automated acquisition and*  
1032 *analysis of small angle X-ray scattering data*. Nuclear Instruments &  
1033 Methods in Physics Research Section a-Accelerators Spectrometers  
1034 Detectors and Associated Equipment, 2012. **689**: p. 52-59.
- 1035 69. Graewert, M.A., et al., *Automated Pipeline for Purification, Biophysical and*  
1036 *X-Ray Analysis of Biomacromolecular Solutions*. Scientific Reports, 2015. **5**.
- 1037 70. Yang, Y., et al., *An Engineered Complement Factor H Construct for*  
1038 *Treatment of C3 Glomerulopathy*. Journal of the American Society of  
1039 Nephrology : JASN, 2018. **29**(6): p. 1649-1661.
- 1040 71. Harris, C.L., et al., *Molecular dissection of interactions between components*  
1041 *of the alternative pathway of complement and decay accelerating factor*  
1042 *(CD55)*. The Journal of biological chemistry, 2005. **280**(4): p. 2569-78.
- 1043
- 1044

1045 **Figure Legends**

1046

1047 **Figure 1. Sbi-III-IV induces C3 futile consumption via the alternative**  
1048 **complement pathway and thereby causes C3b adduct formation and C3a**  
1049 **anaphylatoxin production.**

1050 (a) C3 activation and C3b deposition in NHS after incubation with 10  $\mu$  M  
1051 Sbi-III-IV, visualized using anti-C3d western blot analysis. C3b adducts formed  
1052 with serum proteins are indicated. Positions of  $\alpha$ -120 (C3)  $\alpha'$  110 (C3b) and  
1053  $\alpha'$  -68 (iC3b) are indicated. The 10 minute lag-time in C3 activation we observe  
1054 in the presence of excess Sbi-III-IV (10  $\mu$  M) correlates with the delay reported  
1055 in the natural C3 “tick-over” process, required for supplying the critical  
1056 enzymatic component for the initial fluid phase Alternative Pathway (AP) C3  
1057 convertase. (b) Sbi-C3b adduct formation, visualized with anti-Sbi western blot.  
1058 These adducts migrate at higher than expected molecular weights (Sbi-  $\alpha'$  110:  
1059  $\sim$ 160 kDa and Sbi-  $\alpha'$  68:  $\sim$ 120 kDa, with expected molecular weights of 125  
1060 and 83 kDa, respectively) which is caused by the high pI of the Sbi-III-IV  
1061 construct (pI = 9.3). Sbi-III-IV has a molecular weight of 14.8 kDa, but migrates to  
1062  $\sim$ 22 kDa in SDS-polyacrylamide gel due to the positively charged electrophoresis  
1063 buffer. (c) C3a anaphylatoxin production, followed using anti-C3a western blot  
1064 analysis (showing only the low molecular weight region). (d) FB cleavage,  
1065 monitored by anti-FB western blot analysis. (e) Concentration dependent  
1066 Sbi-III-IV induced C3 consumption, studied by a rabbit erythrocytes haemolytic

1067 assay. Rabbit erythrocytes were exposed to normal human serum pre-incubated  
1068 with Sbi-III-IV (incubated, closed circles) and normal human serum with  
1069 Sbi-III-IV added at the start of the experiment (not incubated, open circles). (f)  
1070 Schematic representation of the relative positions of point mutations that display  
1071 the most profound functional defects, K173A and R231A. (g) C3 consumption  
1072 profiles of Sbi-III-IV mutants K173A and R231A. For b-e and h, one  
1073 representative blot of three independent experiments was shown. For (e), four  
1074 independent measurements of two experiments were shown. The mean and SD  
1075 for each measurement were calculated for all datasets. Curves were fitted using  
1076 non-linear variable slope (four parameters) function in GraphPad Prism.

1077

1078

1079 **Figure 2 Surface plasmon resonance analyses of tripartite complexes.** A  
1080 triply diluted concentration series (4050 to 1.8 nM) of (a) WT or (b) K173A  
1081 Sbi-III-IV were co-injected with plasma purified FH, recombinant FHR-1, FHR-2,  
1082 FHR-5 or FH<sub>19-20</sub>. The red response curves were indicative of binding experiment  
1083 in the absence of Sbi. The co-injection experiments of a fixed analyte  
1084 concentration in combination with increasing Sbi concentration were depicted  
1085 by increasingly dark lines. (c) Relative changes of Sbi-III-IV mediated FH (or FHR)  
1086 binding to C3b. By subtracting the co-injection sensorgram (i.e. Sbi+FH) with the  
1087 corresponding Sbi binding dataset (Supplementary Figure S3), the changes in FH  
1088 (or FHRs) binding was deduced (Supplementary Figure S3). Changes in FH (or

1089 FHRs) binding were expressed as the relative change, derived from dividing the  
1090 Sbi mediated binding by the FH (or FHR) only control, using the  
1091 response-difference values at the equilibrated binding point (173.5 s). Each  
1092 sensorgram is representative of two experiments. Relative change curves were  
1093 fitted using non-linear variable slope (four parameters) function in GraphPad  
1094 Prism.

1095

1096

1097 **Figure 3 Functional characterization of tripartite complexes in**  
1098 **complement AP regulation.** NHS was incubated with Sbi-III-IV, in combination  
1099 with specified reagents or just buffer, the consumption of AP activity was  
1100 indicated by the protection of rabbit red blood cell from lysis. (a) Pre-incubation  
1101 of recombinant FHR-1 or -2 with the presence or absence of Sbi-III-IV. (b)  
1102 Pre-incubation of recombinant FHR-5 with the presence or absence of Sbi-III-IV.  
1103 (c) Pre-incubation of recombinant FH<sub>19-20</sub> or FHR-1<sub>1-2</sub> with the presence or  
1104 absence of Sbi-III-IV. Using an ELISA assay, the ability of FHR-1, -2, -5, FH<sub>19-20</sub> or  
1105 FHR-1<sub>1-2</sub> to modulate FH binding to a C3b coated surface was studied in the  
1106 presence of WT (d), no (e) or K173A Sbi-III-IV (f). C3 convertase formation in the  
1107 absence (g) or presence of Sbi-III-IV (h) was assessed by flowing factor B (500  
1108 nM) and factor D (100 nM) in the presence of FH (2000 nM) or FH +FHR-1 (2000  
1109 and 200 nM) or FH+FHR-1&-5 (2000, 200 and 20 nM) across a surface amine  
1110 coupled with 500 RU C3b. To form Sbi bound C3 convertase, experiments were

1111 conducted in addition of 2000 nM of Sbi-III-IV. Detailed experimental and data  
1112 processing procedures are provided in *material and methods* and Supplementary  
1113 Figure S3E. (i) Percentage of intact C3b derived from continuous recording of  
1114 ANS fluorescence changes between 465-475 nm spectrum. Baseline C3b  
1115 breakdown curve (-) was recorded in the presence of FH and FI, interference  
1116 caused by the addition of FHR-5 (+) or FHR-5 in combination of Sbi (++) was also  
1117 examined. The data for FHR-1 and FHR-2 are presented in Supplementary Figure  
1118 3F. Normalized data was depicted in solid lines, simulated breakdown curves  
1119 were shown as dotted-lines. Each curve represents the mean value of three  
1120 independent experiments. For (a-f), the mean and standard deviation for each  
1121 measurement was calculated; For (g-h), each sensorgram is representative of  
1122 two experiments. For (i), simulated breakdown curves were fitted using one  
1123 phase exponential decay function in GraphPad Prism.

1124

1125 **Figure 4. Structural analysis of the Sbi-III-IV:C3d:FHR-1 tripartite complex.**

1126 SAXS solution structure analysis and EOM modeling of the Sbi-III-IV:C3d:FHR-1  
1127 tripartite complex: (a) Left panel, fit of the selected ensemble of conformers to  
1128 the experimental scattering. Radius of gyration ( $R_g$ , middle panel), particle  
1129 maximum dimension ( $D_{max}$ , right panel), and distribution histograms of the  
1130 selected conformers versus the pool. (b) Kratky plot of the tripartite complex. c)  
1131 Examples of rigid body models of the selected conformers corresponding to the  
1132 histogram peaks. The volume fraction of each species is indicated. The relative

1133 positions of C3d, Sbi-III-IV and FHR-1 in the dimeric tripartite complex are  
1134 indicated, with C3d in red, Sbi-IV in dark blue, Sbi-III in turquoise and FHR-1 in  
1135 orange. (d) Schematic representation of the dimeric Sbi-III-IV:C3d:FHR-1  
1136 tripartite complex.  
1137 (e) Comparison of the solutions structure of wild-type Sbi-III-IV:C3d and  
1138 mutated version Sbi-III-IV(K173A):C3d of the dual complex. Radius of gyration  
1139 ( $R_g$ ), particle maximum dimension ( $D_{max}$ ), and distribution histograms of the  
1140 selected conformers versus the pool are shown in Supplementary Figure S4A. (f)  
1141 *Ab initio* shape reconstruction shown as gray spheres in comparison to the  
1142 partial crystal structure Sbi-IV:C3d (2wy8). (g) Examples of rigid body models.  
1143 Complete set of models as well as flexibility assessment is presented in  
1144 supplement Figures S5. C3d in shown red, Sbi-IV in dark blue, and Sbi-III in  
1145 turquoise.

1146

1147 **Figure 5. Structural and functional analysis of the Sbi-III-IV-Ag85b fusion**  
1148 **protein.** (a) Schematic structure of the Sbi-III-IV-Ag85b fusion protein (see fo  
1149 details Supplementary Figure S9). (b) SAXS analysis of the fusion protein  
1150 indicates a monomeric molecule with a radius of gyration of  $R_g=3.7$  nm and  
1151 maximum particle size of  $D_{max}=15$  nm. The various molecular mass estimation  
1152 range from 44 -51 kDa and are comparable with a predicted monomer mass of  
1153 50 kDa. The 10 independent *ab initio* models obtained with DAMMIF are similar  
1154 to each other, and according to the  $\chi^2$  values that estimate the goodness of the fit,

1155 the final structures fit well with the experiment. More detailed modelling with  
1156 Coral and EOM show that the flexibility of the missing structural information is  
1157 restricted. (c) C3 activation and C3-fragment deposition in NHS after incubation  
1158 with Sbi-III-IV-Ag85b (100  $\mu$ M) or Ag85b (100  $\mu$ M), visualized using anti-Sbi and  
1159 anti-C3d western blot analysis. Resultant higher molecular weight bands with  
1160 Sbi III-IV-Ag85b were identified as Sbi-III-IV-Ag85b with two covalently attached  
1161 C3b  $\alpha'$  chains; Sbi-III-IV-Ag85b with two iC3b  $\alpha'$ -68 chains and Sbi-III-IV-Ag85b  
1162 with two C3d molecules. Ag85b alone is unable to activate C3 as indicated by the  
1163 presence of an intact C3  $\alpha$ -chain.

1164

1165 **Figure 6. Sbi-III-IV is an effective adjuvant in mice.**

1166 (a) Freshly prepared CD21<sup>-/-</sup> mouse serum was mixed with Sbi-III-IV-Ag85b or  
1167 just Sbi-III-IV. The reaction was stopped at various time points (0, 30, 60, 120  
1168 minutes). Western blot was developed with rabbit anti-C3 at 1/1000 and goat  
1169 anti-rabbit at 1/2000. C3d is shown as confirmation that C3 has been activated  
1170 and broken down. (N) is *Cr2*<sup>-/-</sup> serum incubated for 120 minutes with saline. (b)  
1171 C57Bl/6 mice (groups of 6) were immunised intraperitoneally with either  
1172 2.7 $\mu$ g Sbi-III-IV-Ag85b protein, 2 $\mu$ g Ag85b, or 0.7 $\mu$ g Sbi-III-IV plus 2 $\mu$ g Ag85b in  
1173 150mM NaCl solution, followed by weekly bleed and boosted (day 28) before  
1174 terminal bleed at day 49. Serum IgG reactivity to Ag85b was measured over time  
1175 by ELISA. Sera was diluted 1/50 and the mean absorbance  $\pm$  SEM of each mouse  
1176 group is shown. All data has been normalised to the day 0 average of all WT mice.

1177 (c) The previous experiment was repeated in C57Bl/6 mice deficient of C3  
1178 (C3<sup>-/-</sup>) and complement receptor type I and 2 (Cr2<sup>-/-</sup>). Data is representative of at  
1179 least 2 repeats. (d) Schematic representation of the dimeric Sbi-III-IV:C3d:FHR-1  
1180 solution structure providing a nidus for AP C3 convertase generation that  
1181 overwhelms local complement regulators, leading to the opsonisation of the  
1182 nearby antigen surface by C3 break-down products that help facilitate the  
1183 co-ligation of the B cell antigen receptor (BCR) with complement receptor 2 (CR2)  
1184 thereby lowering the threshold for B cell activation.

1185

1186



1

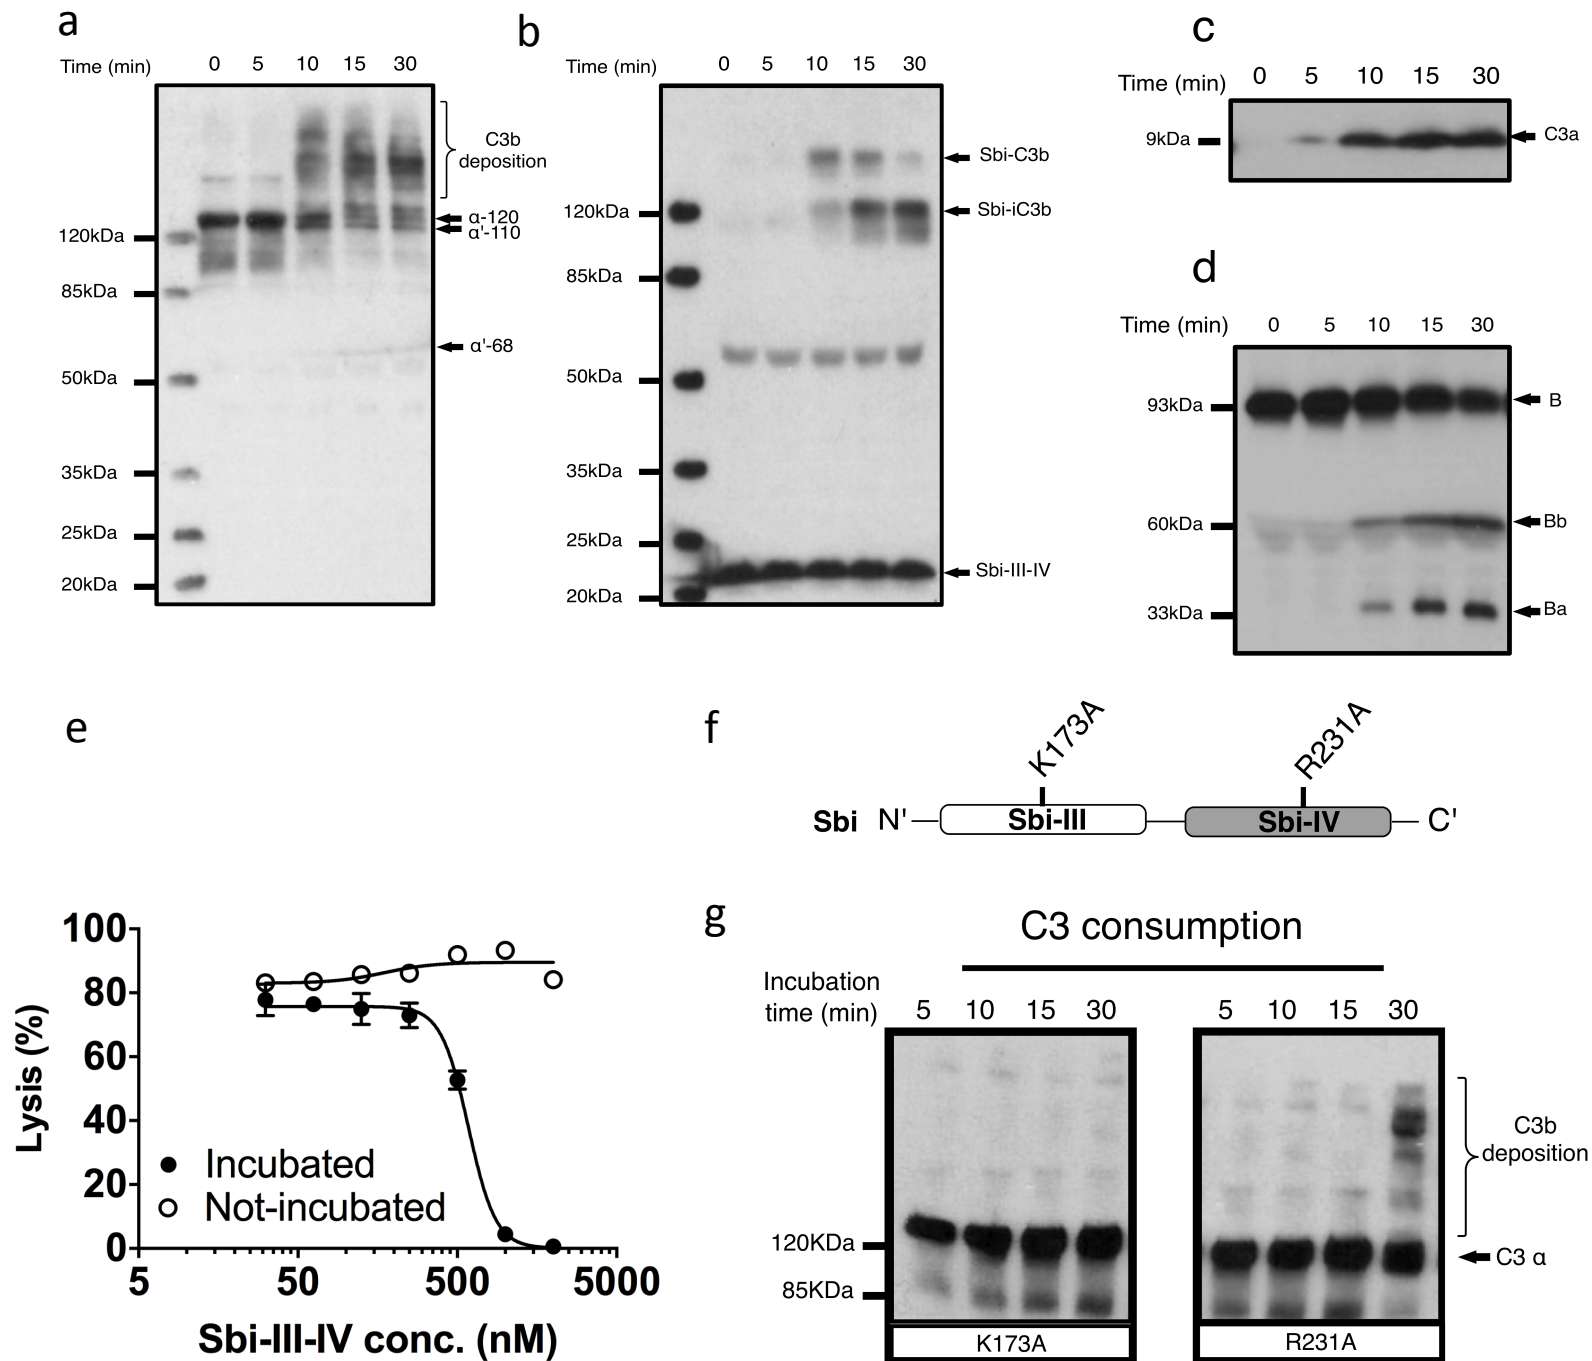

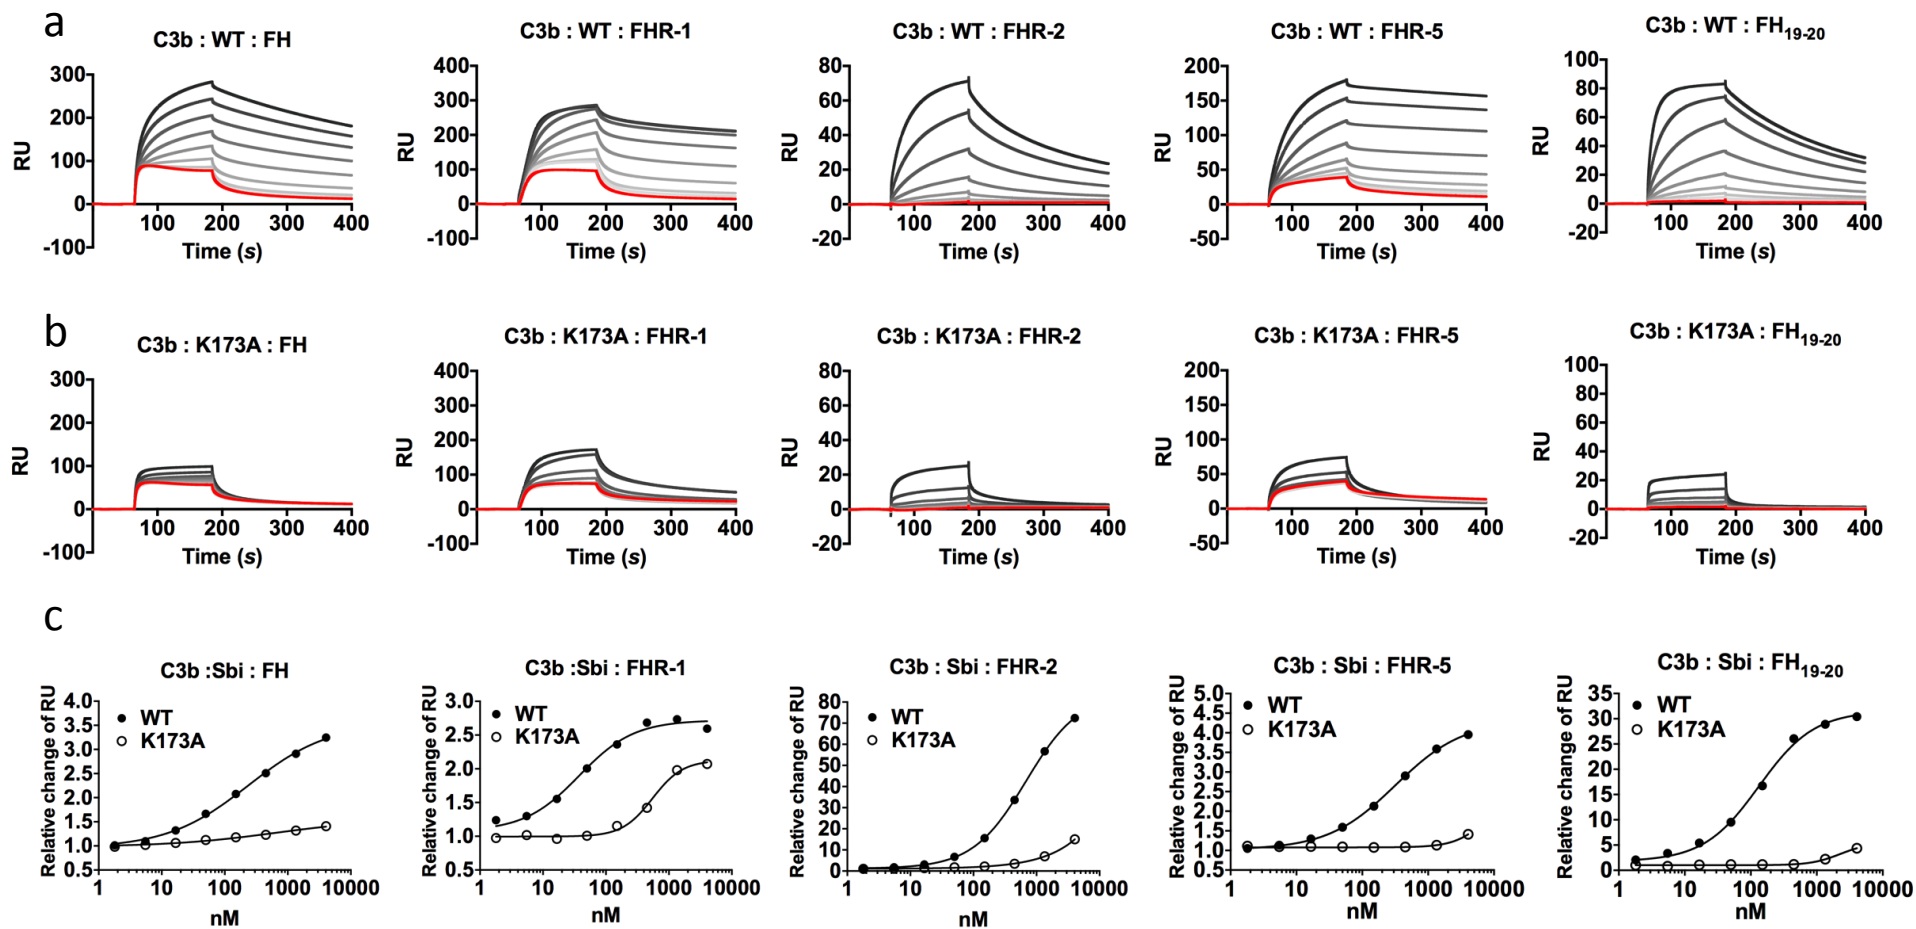

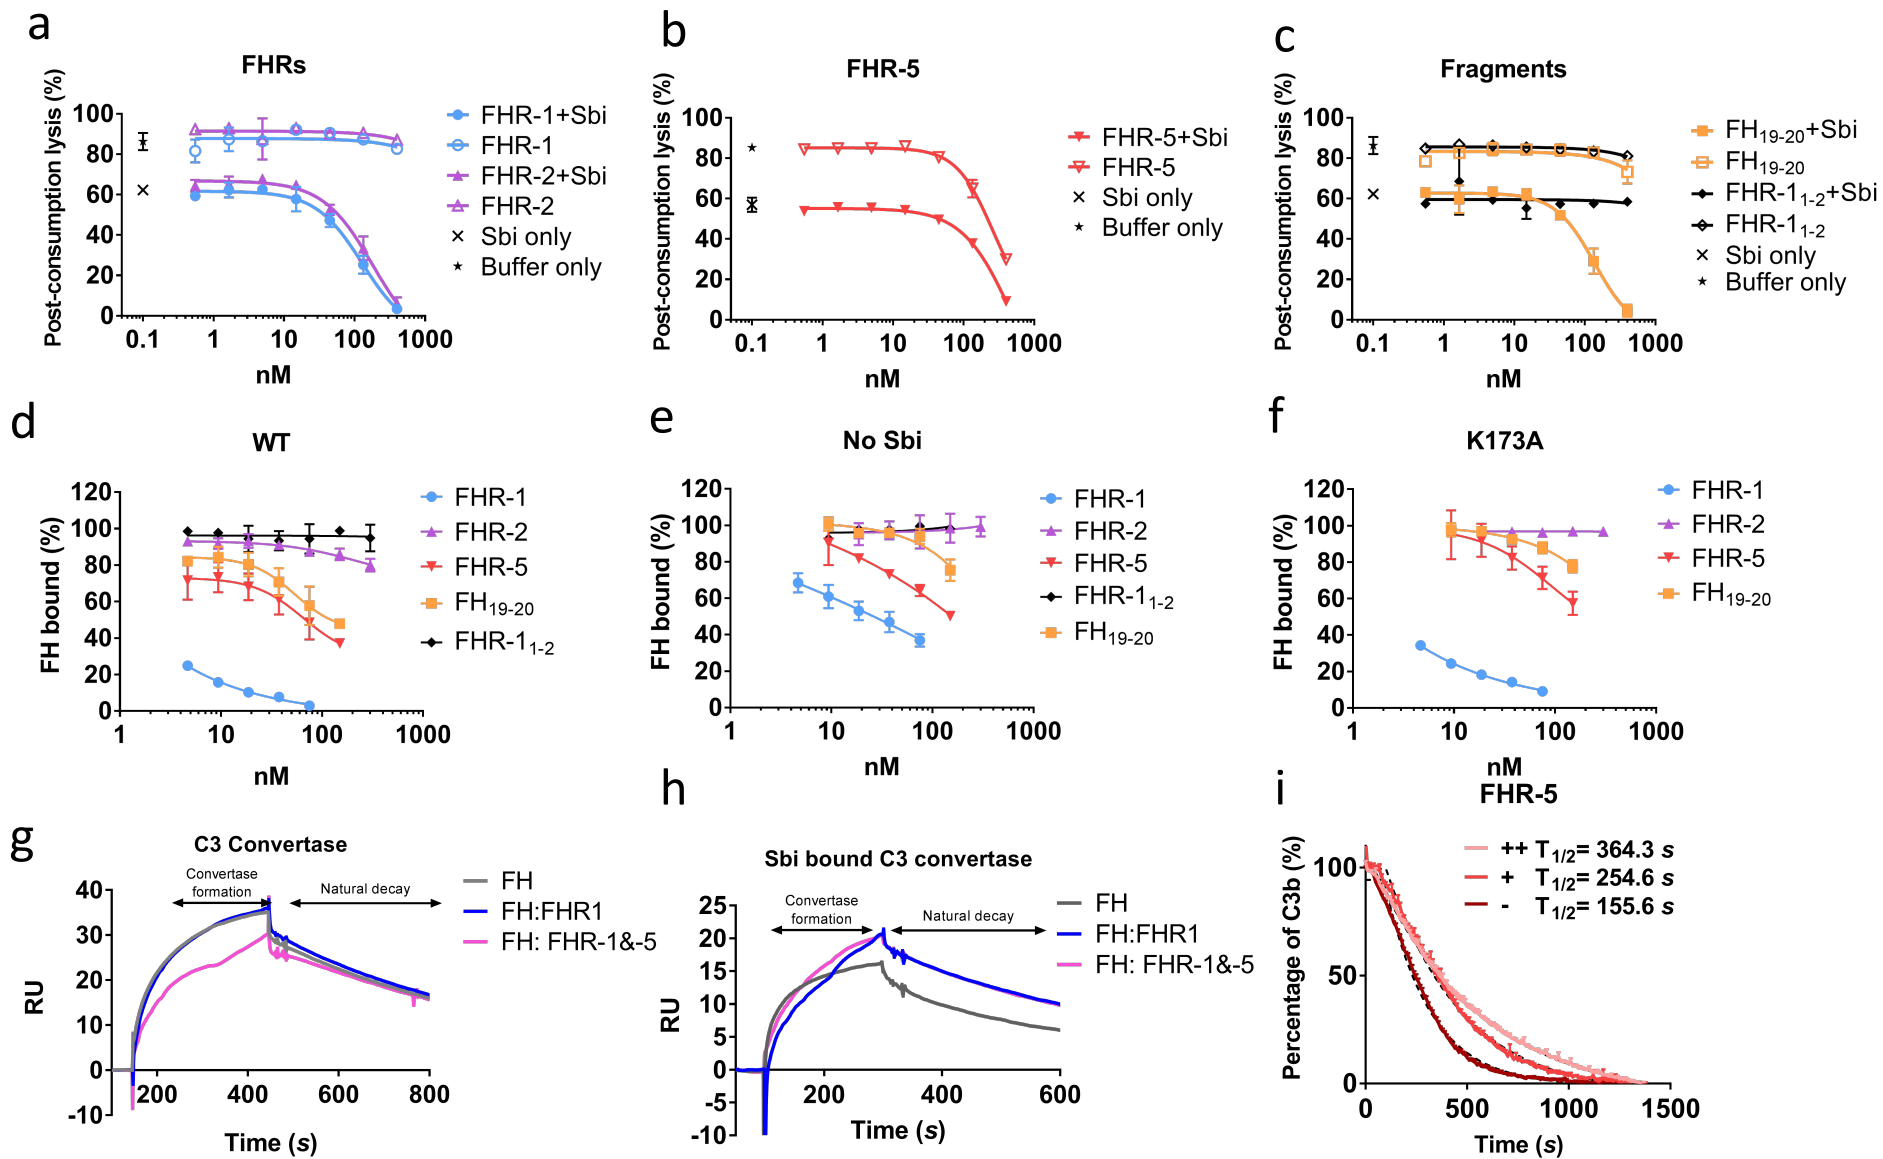

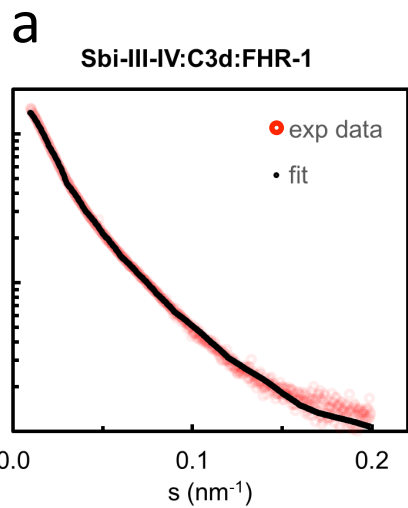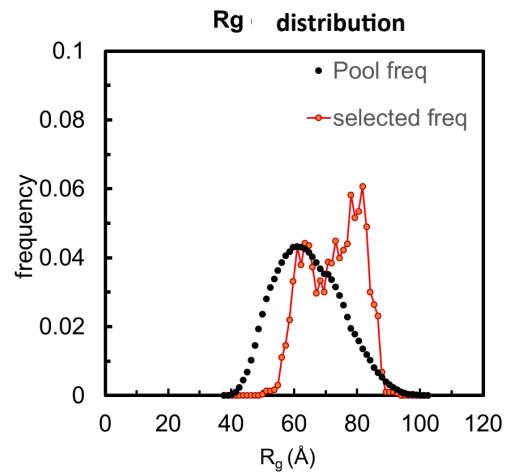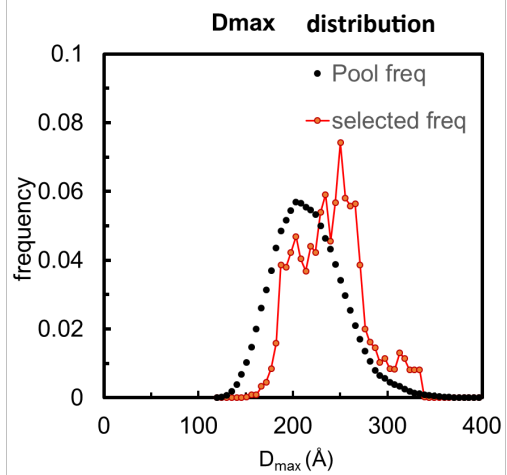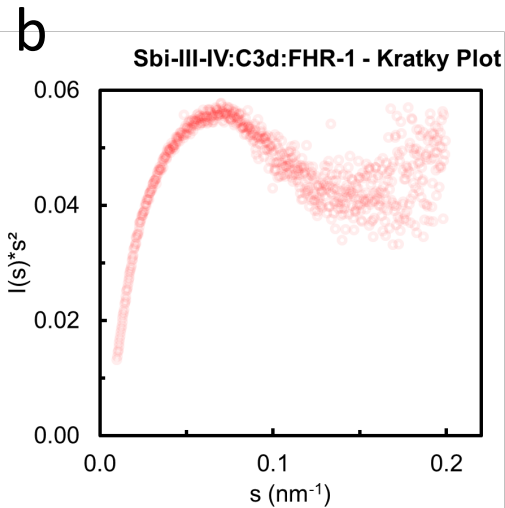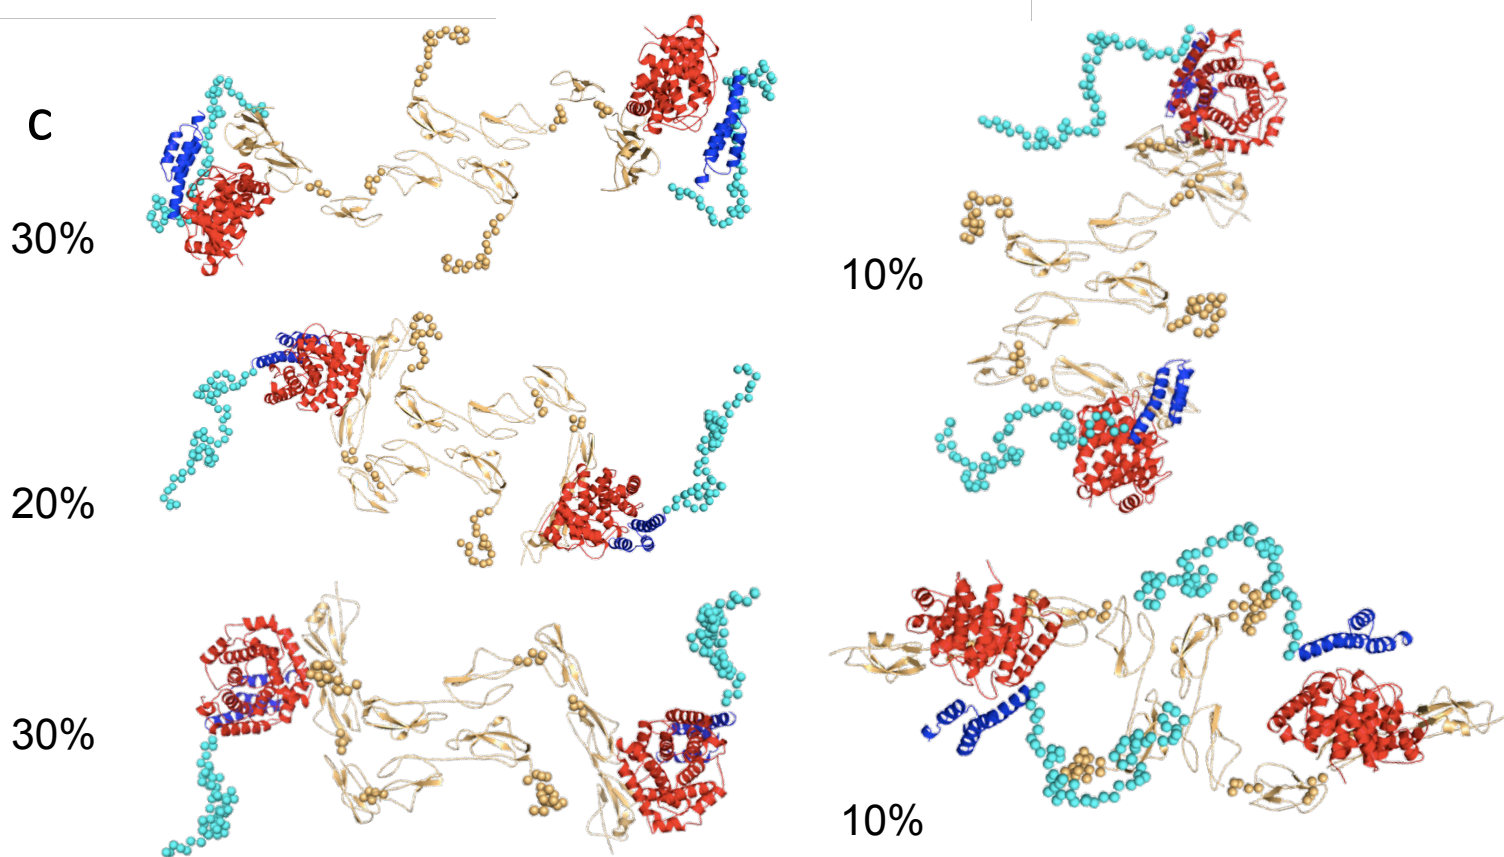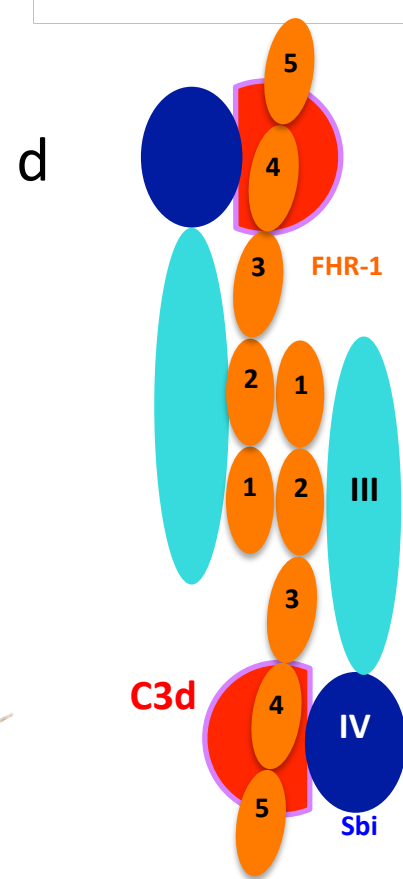

4

e

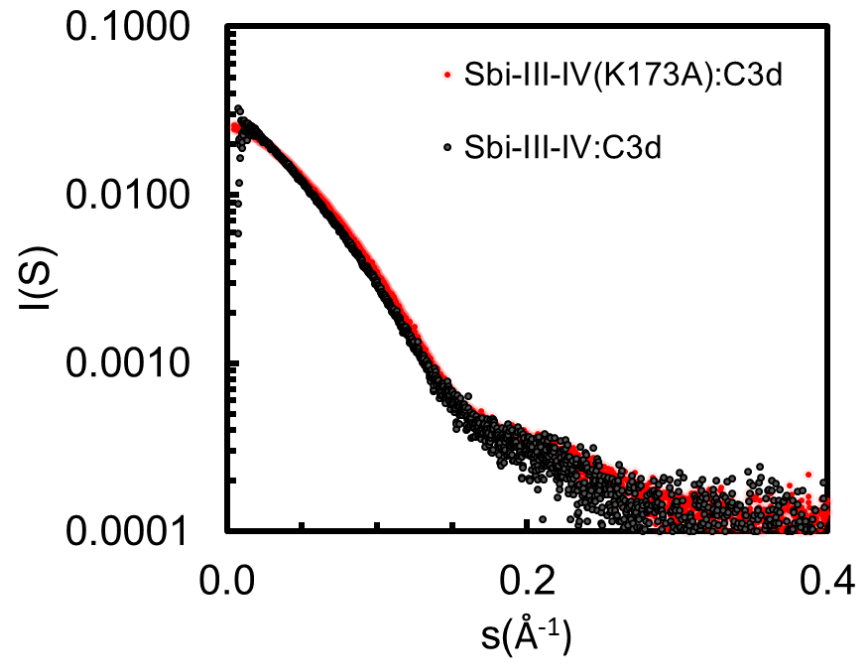

f

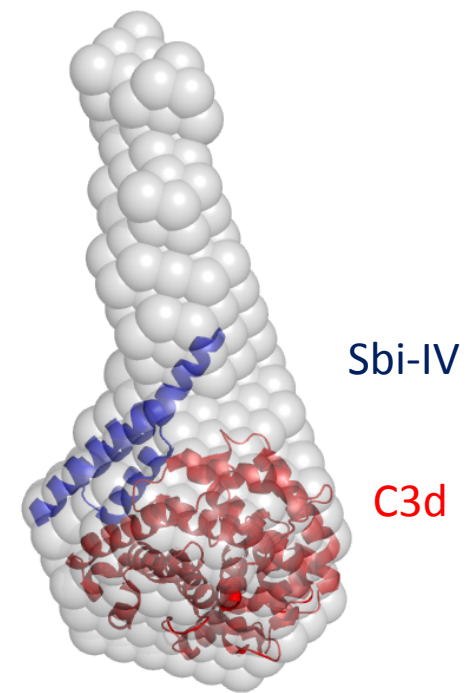

g

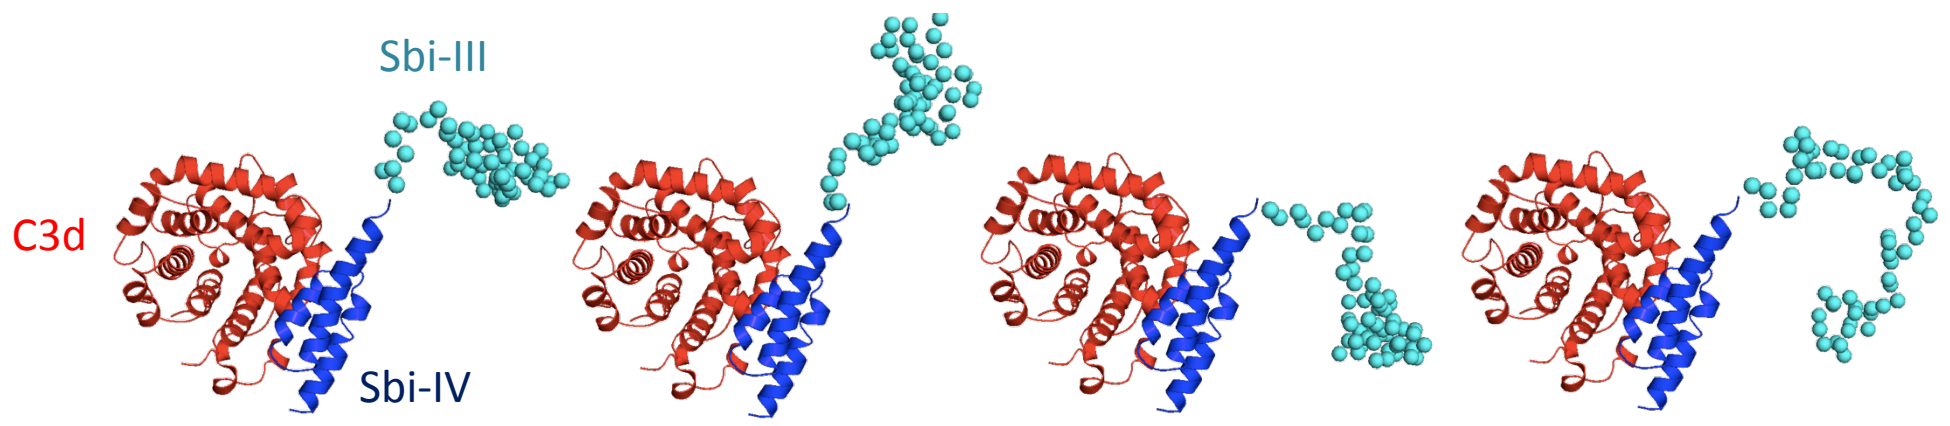

5

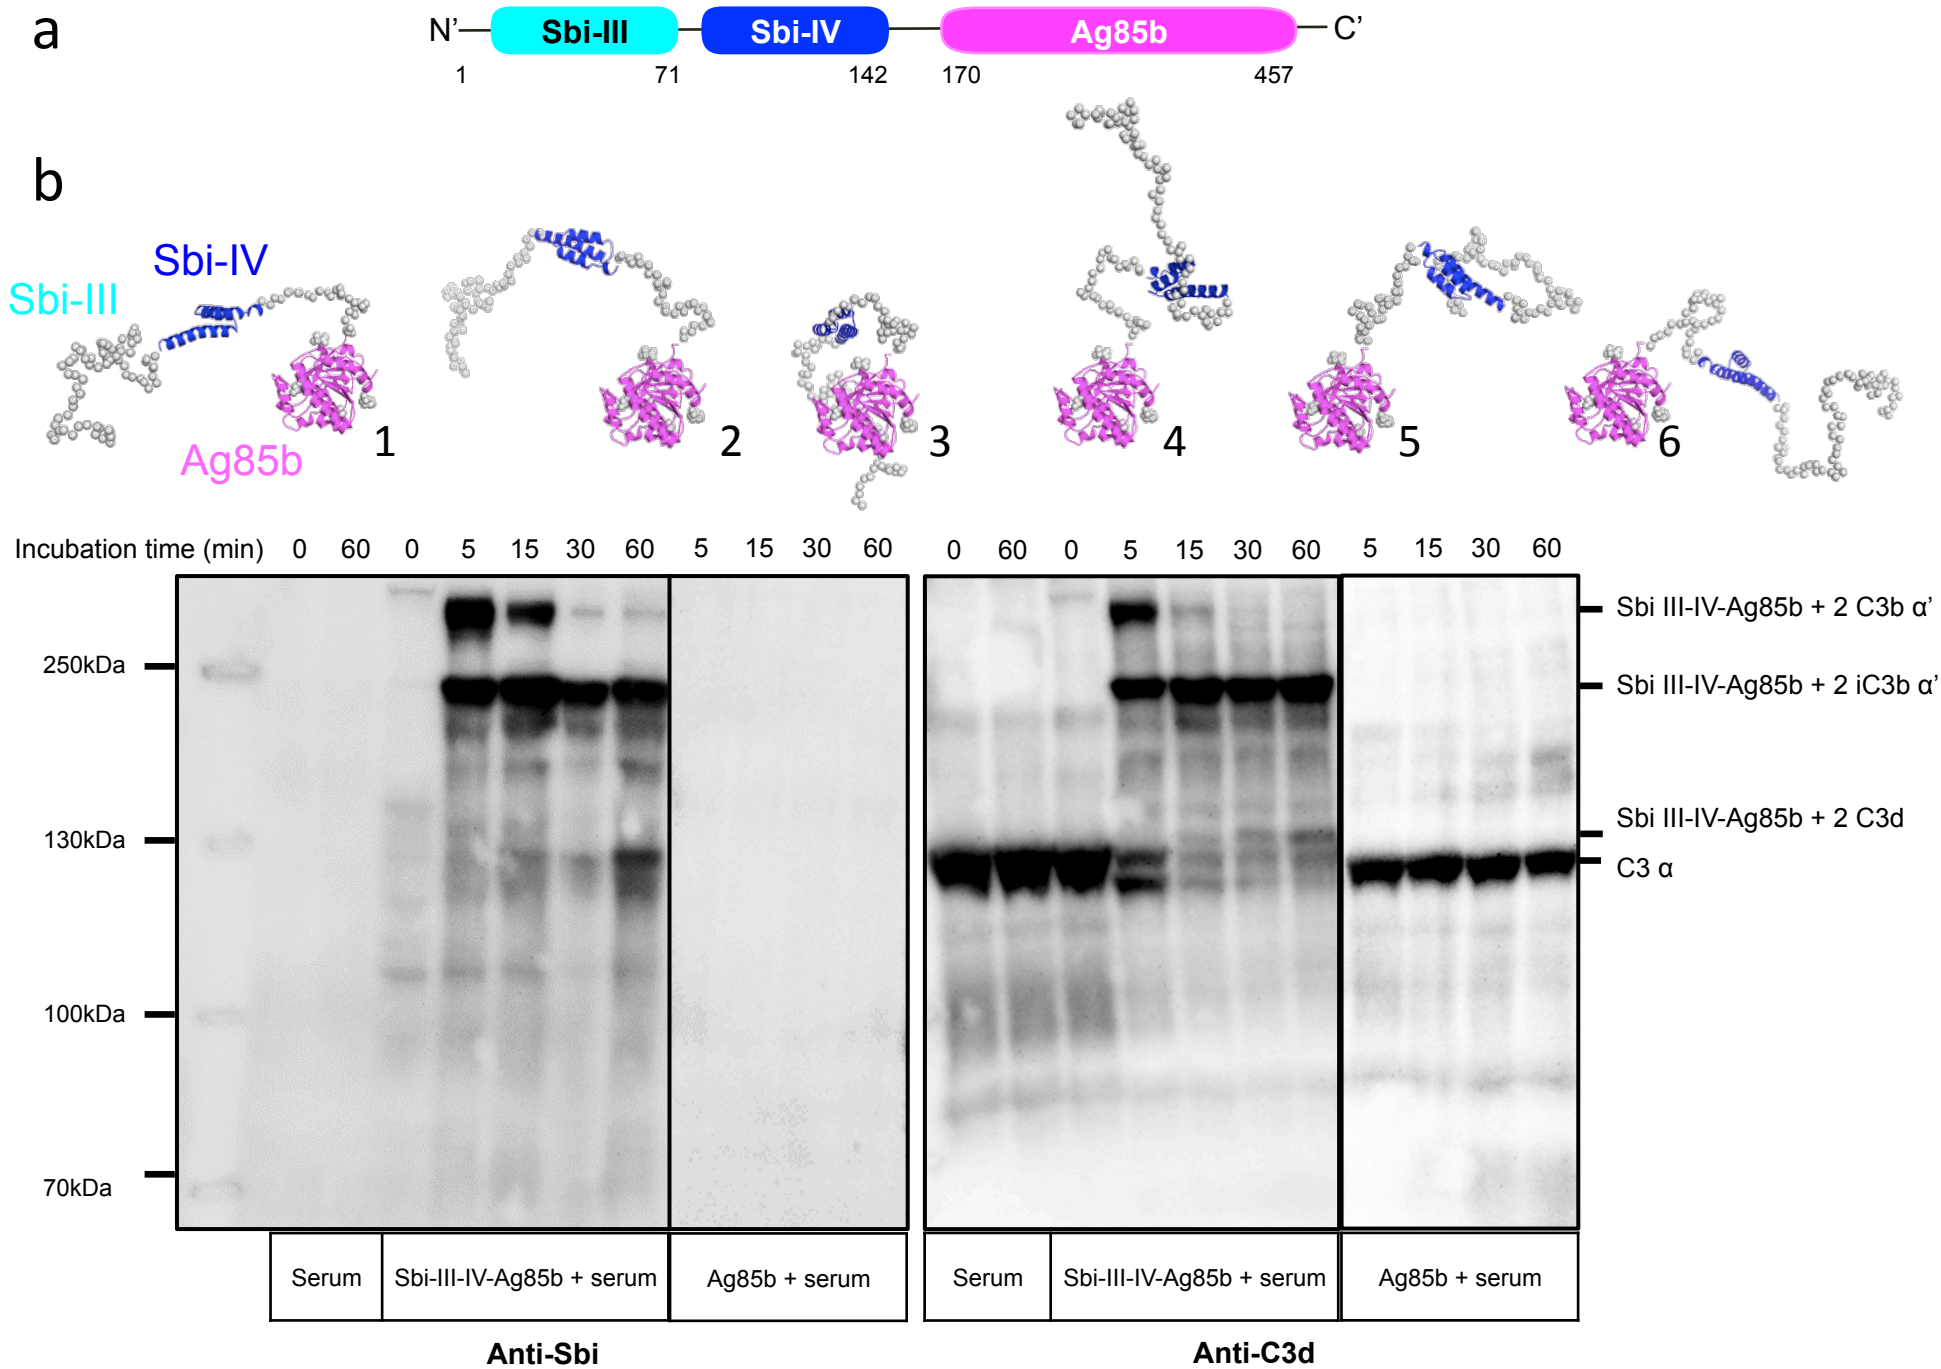



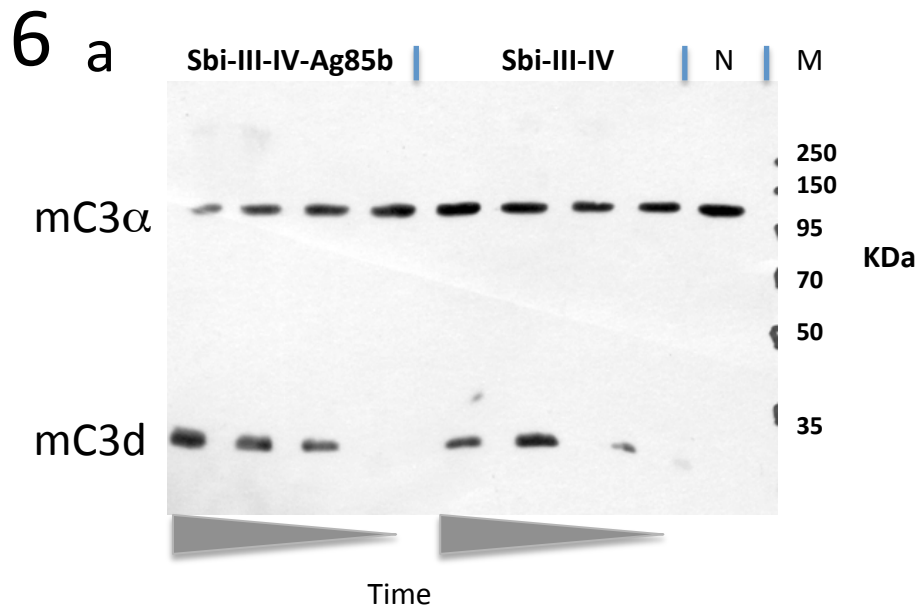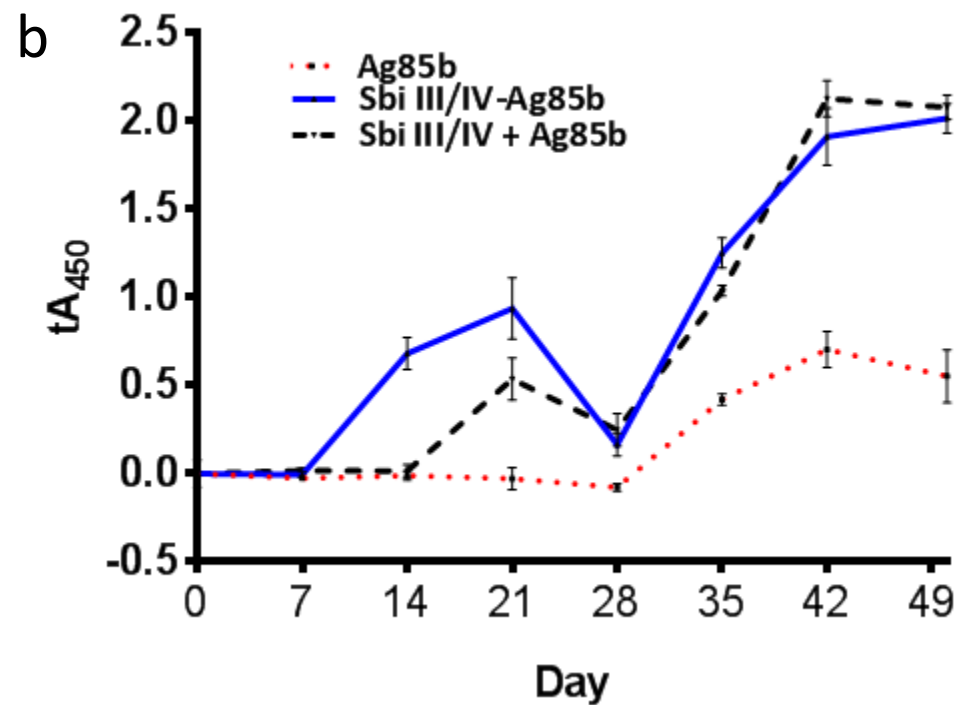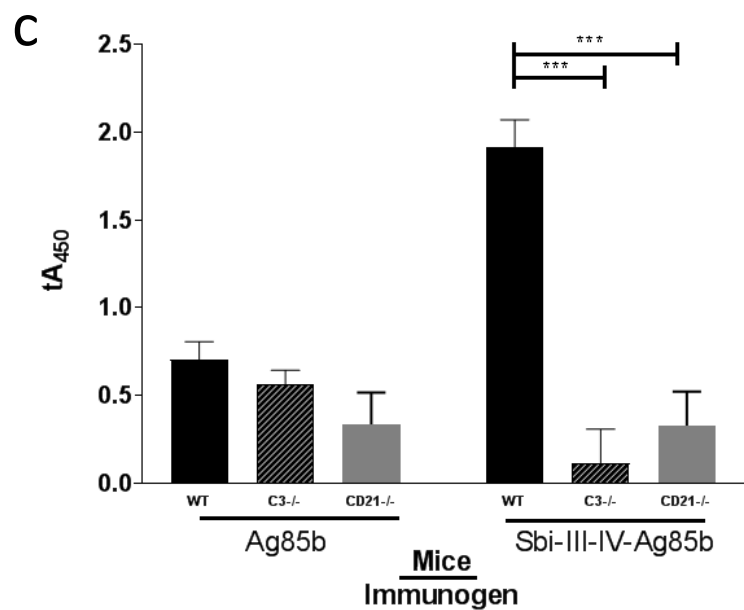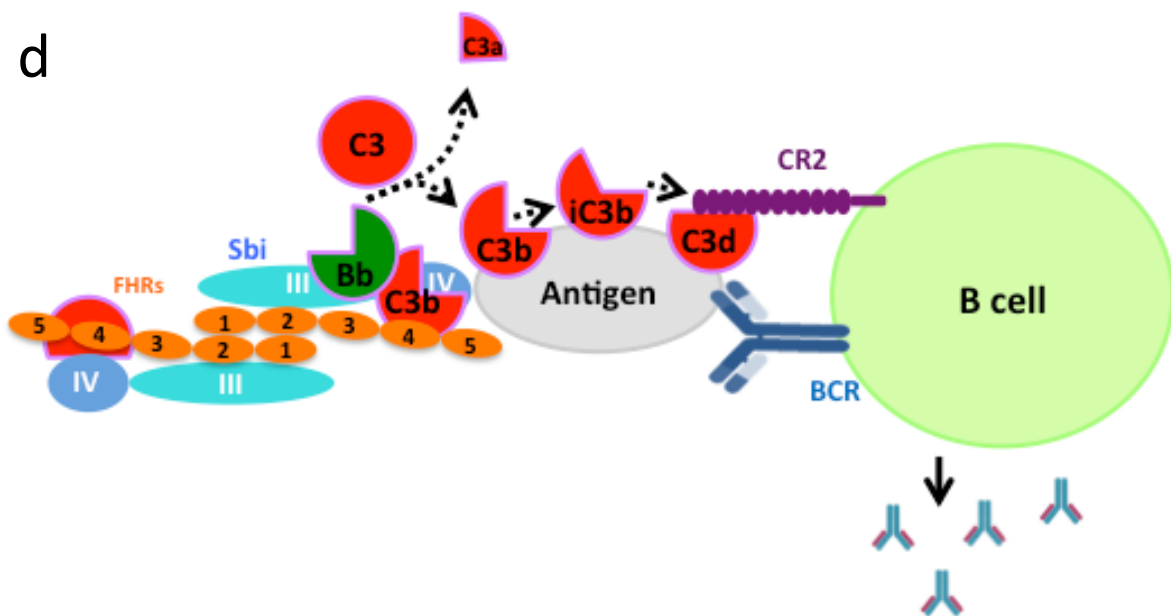

Table 1. Sbi-III-IV:C3d interaction affinity determined by *SwitchSENSE*

|           | $K_d$ (nM) | $k_{ON}$ ( $M^{-1}S^{-1}$ ) | $k_{OFF}$ ( $S^{-1}$ )   |
|-----------|------------|-----------------------------|--------------------------|
| WT:C3d    | 5.0±0.8    | 5.9±1.0×10 <sup>5</sup>     | 3.0±0.1×10 <sup>-3</sup> |
| K173A:C3d | 5.8±1.2    | 5.3±0.9×10 <sup>5</sup>     | 3.0±0.4×10 <sup>-3</sup> |
| R231:C3d  | No binding |                             |                          |

Table 2. Sbi-III-IV:C3d complex hydrodynamic diameter determined by *SwitchSENSE*

|       | $D_H$ (nm) of Sbi-III-IV | $D_H$ (nm) of Sbi:C3d complex |
|-------|--------------------------|-------------------------------|
| WT    | 4.3±0.1                  | 6.6±0.2                       |
| K173A | 3.8±0.3                  | 5.0±0.3                       |
| R231A | 4.7±0.3                  | No binding                    |
